# Supplementary material
Source: PubMed Central journal article supplement (PMC3827836)
Supplement: ct400486p_si_001.pdf [file ct400486p_si_001.pdf]

# Specialized Dynamical Properties of Promiscuous Residues Revealed

## by Simulated Conformational Ensembles

Arianna Fornili, Alessandro Pandini, Hui-Chun Lu, Franca Fraternali

### Supporting Information

#### I. Supplementary Figures:

**Figure S1.** Functional annotation of  $S^{\text{Full}}$ .

**Figure S2.** Physicochemical properties of interface residues in the  $c_{\text{mono\_in\_multi}}$  and  $c_{\text{multi}}$  binding classes of  $S^{\text{Soc}}$ .

**Figure S3.** Conformational flexibility of interface residues in  $S^{\text{Full}}$  and  $S^{\text{Soc}}$  ( $C^\alpha$  and side chains).

**Figure S4.** Comparison of conformational flexibility of  $S^{\text{Full}}$  and  $S^{\text{MD}}$  interface residues from simulated ensembles (tCONCOORD, MD, GNM) and experimental structures (PDB).

**Figure S5.** Correlation between RMSF and binding multiplicity profiles in  $S^{\text{Full}}$ .

**Figure S6.** Pairwise comparison of hotspot prediction methods.

**Figure S7.** Analysis of correlated motions in  $S^{\text{MD}}$ .

**Figure S8.** Analysis of the conformational variability within PDB ensembles in  $S^{\text{Full}}$  (side chains).

**Figure S9.** Examples of multi-partner residues in Neddylin.

**Figure S10.** Water distribution around the SUMO-2 protein.

#### II Supplementary Tables

**Table S1.** List of the 251 proteins in the  $S^{\text{Full}}$  dataset.

**Table S2.** List of the 12 proteins in the  $S^{\text{MD}}$  dataset.

**Table S3.** List of the 69 sociable proteins in the  $S^{\text{Soc}}$  dataset.

**Table S4.** Distribution of residues and interfaces over the three binding classes  $c_{\text{mono}}$ ,  $c_{\text{mono\_in\_multi}}$  and  $c_{\text{multi}}$  for the  $S^{\text{Full}}$ ,  $S^{\text{MD}}$  and  $S^{\text{Soc}}$  datasets.

**Table S5.** Criteria used for the different hot spot prediction methods.

**Table S6.** Composition of the 12 systems used for MD simulations of the  $S^{\text{MD}}$  dataset.

**Table S7.** Analysis of pairwise RMSD distributions of tCONCOORD and MD ensembles.

**Table S8.** Comparison between pairs of RMSF profiles from the tCONCOORD, MD, GNM and PDB ensembles ( $C^\alpha$  and side chains).

**Table S9.** Overlap between the tCONCOORD, MD and PDB essential spaces.

**Table S10.** Average per-residue entropy for  $c_{\text{mono\_in\_multi}}$  and  $c_{\text{multi}}$  residues in  $S^{\text{MD}}$ .

**Table S11.** Percentage of  $c_{\text{multi}}$  residues classified as hot spots in 1 to 4 different interfaces.

**Table S12.** SNP and DisSNP propensity in the  $S^{\text{Full}}$  and  $S^{\text{Soc}}$  datasets (values per protein).

**Table S13.**  $C^\alpha$  and side chain RMSF Z-scores of  $c_{\text{mono\_in\_multi}}$  and  $c_{\text{multi}}$  interface residues of Neddylin.

**Table S14.**  $C^\alpha$  and side chain RMSF Z-scores of  $c_{\text{mono\_in\_multi}}$  and  $c_{\text{multi}}$  interface residues of SUMO-2.

## I. Supplementary Figures

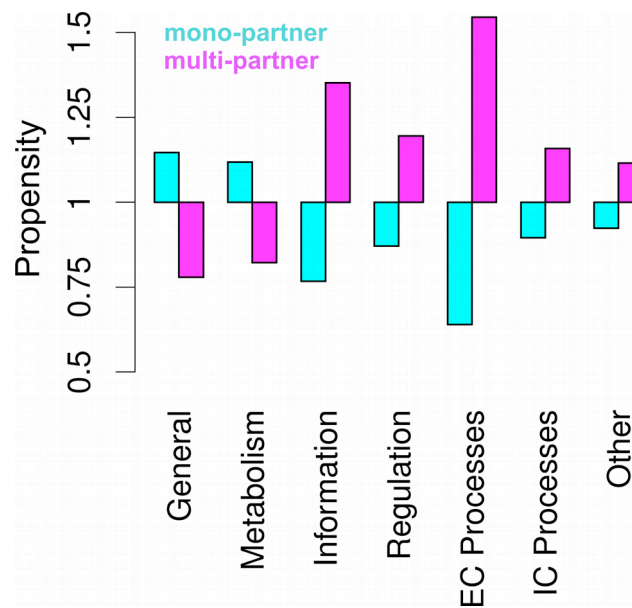

**Figure S1. Functional annotation of  $S^{\text{Full}}$ .** Propensity of mono-partner (cyan) and multi-partner (magenta) proteins for 7 general function categories (Vogel et al. (2006) PLoS Comput Biol 2: e48). Propensities are calculated as the abundance of a function category in each protein binding class relative to the average abundance in  $S^{\text{Full}}$ .

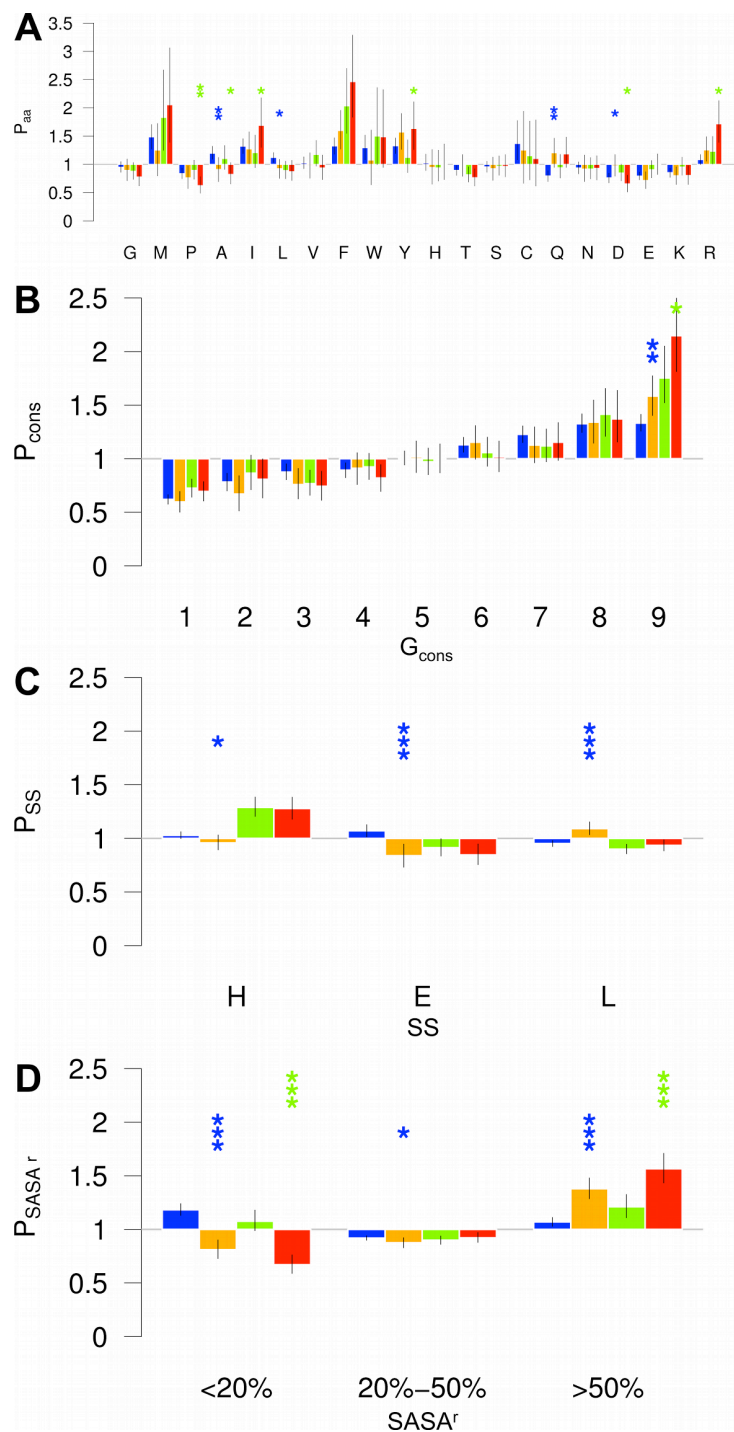

**Figure S2. Physicochemical properties of interface residues in the  $c_{\text{mono\_in\_multi}}$  and  $c_{\text{multi}}$  binding classes of  $S^{\text{Soc}}$ .** (A-D) Propensities relative to the surface at  $c_{\text{mono\_in\_multi}}$  (green) and  $c_{\text{multi}}$  (red) positions of the  $S^{\text{Soc}}$  dataset. Results from  $c_{\text{mono\_in\_multi}}$  (blue) and  $c_{\text{multi}}$  (orange) residues of  $S^{\text{Full}}$  are reported as reference. Error bars and significance levels (indicated with a star code) were estimated with bootstrap resampling (see Figure 2 legend). The significance levels are reported only for comparisons between residues from the same dataset. (A) Amino acid propensity  $P_{\text{aa}}$ . (B) Conservation propensity  $P_{\text{cons}}$ . The conservation is expressed as ConSurf conservation grade ( $G_{\text{cons}}$ ). (C) DSSP secondary structure (SS) propensity  $P_{\text{SS}}$ . (D) Relative solvent accessibility propensity  $P_{\text{SASA}}^r$ .

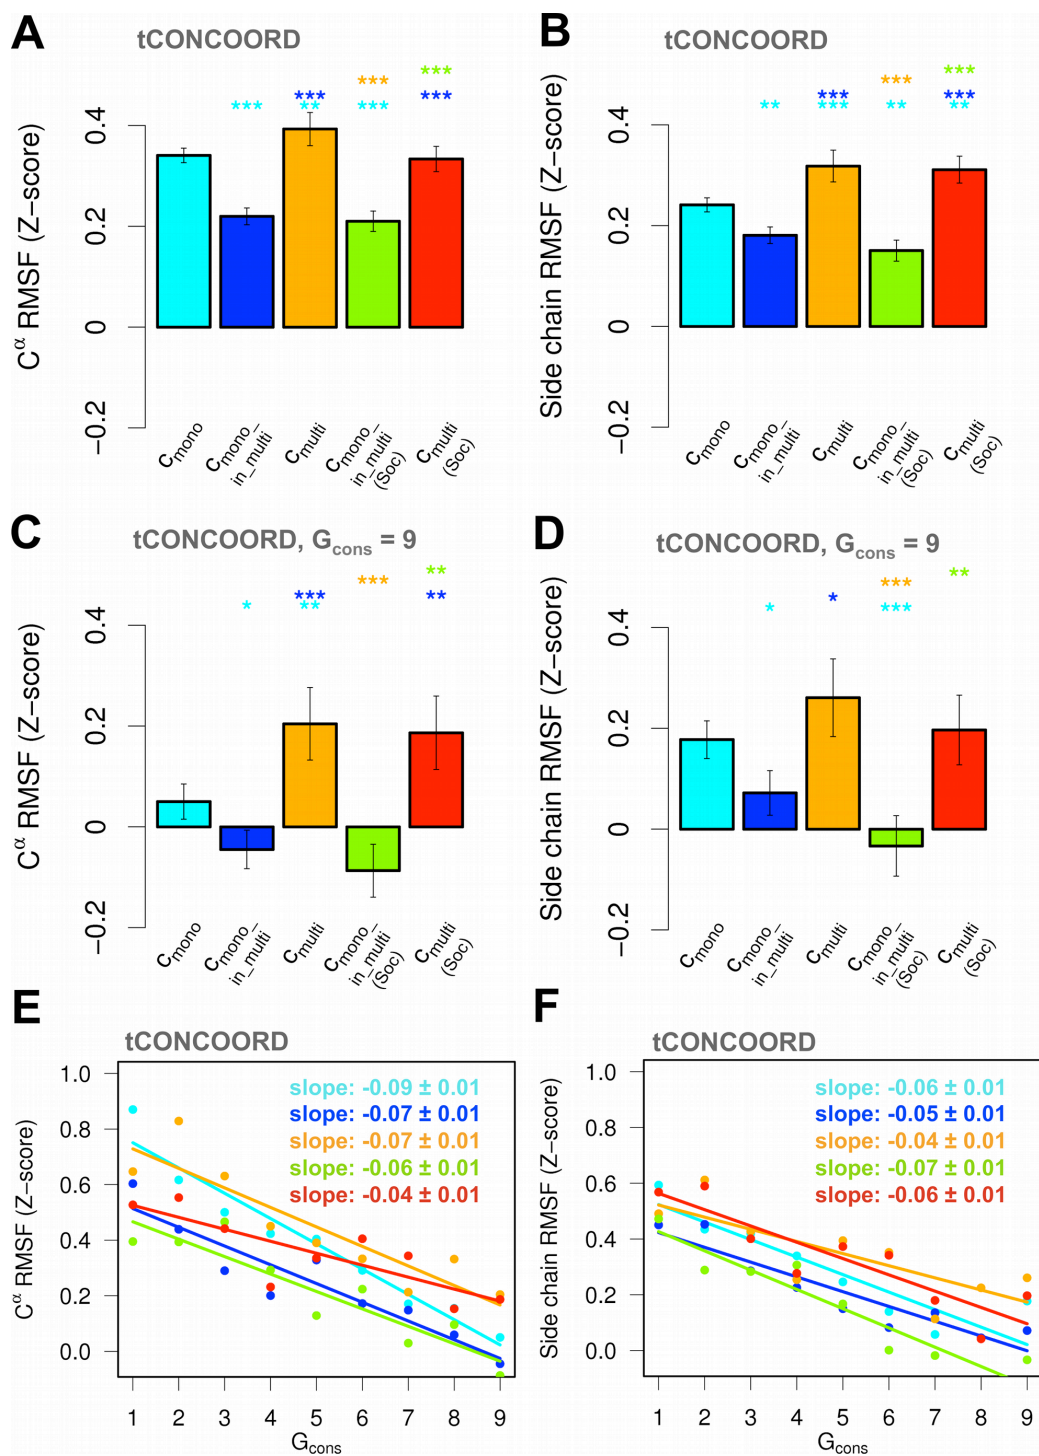

**Figure S3. Conformational flexibility of interface residues in S<sup>Full</sup> and S<sup>Soc</sup>.** (A-D) Average C<sup>α</sup> (A/C) and side chain (B/D) RMSF Z-scores (tCONCOORD) of all interface residues (A/B) and of the most conserved (G<sub>cons</sub> = 9) interface residues (C/D) for the three binding classes c<sub>mono</sub> (cyan), c<sub>mono\_in\_multi</sub> (blue) and c<sub>multi</sub> (orange) of S<sup>Full</sup> and the two binding classes c<sub>mono\_in\_multi</sub> (green) and c<sub>multi</sub> (red) of S<sup>Soc</sup>. The standard error of the mean is represented with an error bar. The significance levels from pair-wise Wilcoxon comparison tests are reported with a star code (see Figure 2 legend). (E/F) Dependence of tCONCOORD average C<sup>α</sup> (E) and side chain (F) RMSF Z-scores (dots) from the ConSurf conservation grade (G<sub>cons</sub>). A best-fit linear regression is also reported for each binding class.

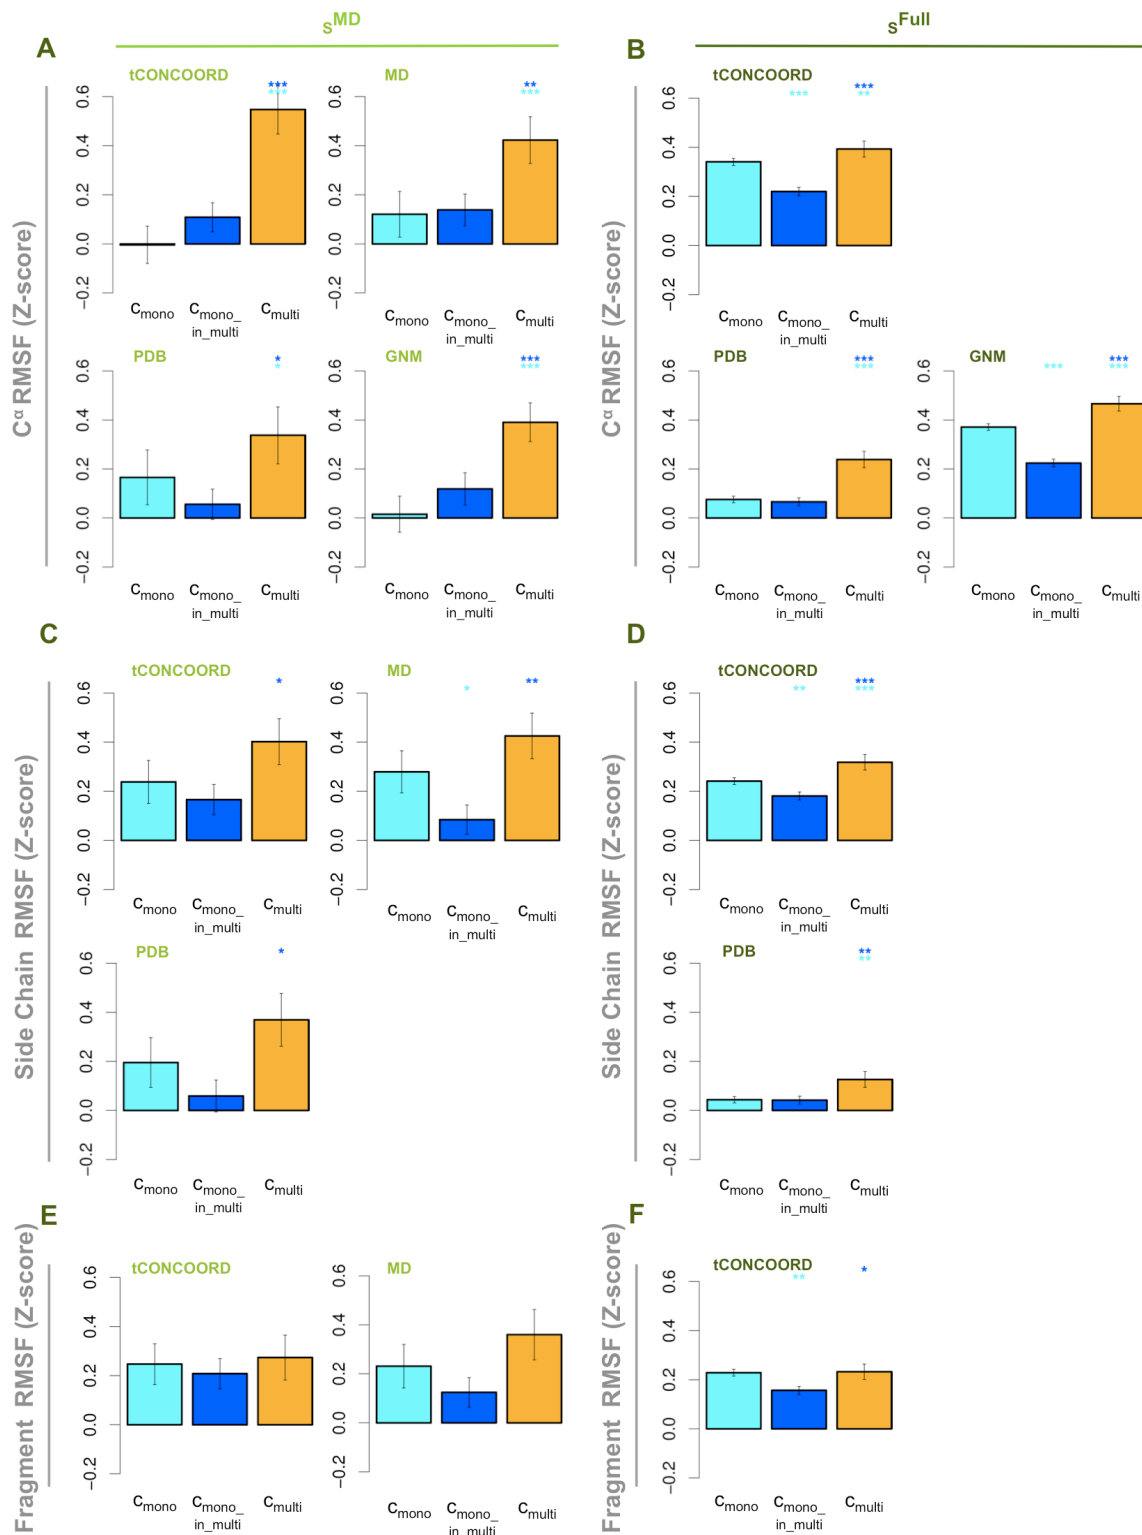

**Figure S4. Comparison of conformational flexibility of  $S^{Full}$  and  $S^{MD}$  interface residues from simulated ensembles (tCONCOORD, MD, GNM) and experimental structures (PDB).** Average  $C^{\alpha}$  (A/B), side chain (C/D) and fragment (E/F) RMSF Z-scores of interface  $c_{mono}$  (cyan),  $c_{mono\_in\_multi}$  (blue) and  $c_{multi}$  (orange) residues in  $S^{MD}$  (left panels) and  $S^{Full}$  (right panels). The standard error of the mean is represented with an error bar. The significance levels from pair-wise Wilcoxon comparison tests are reported with a star code (see Figure 2 legend).

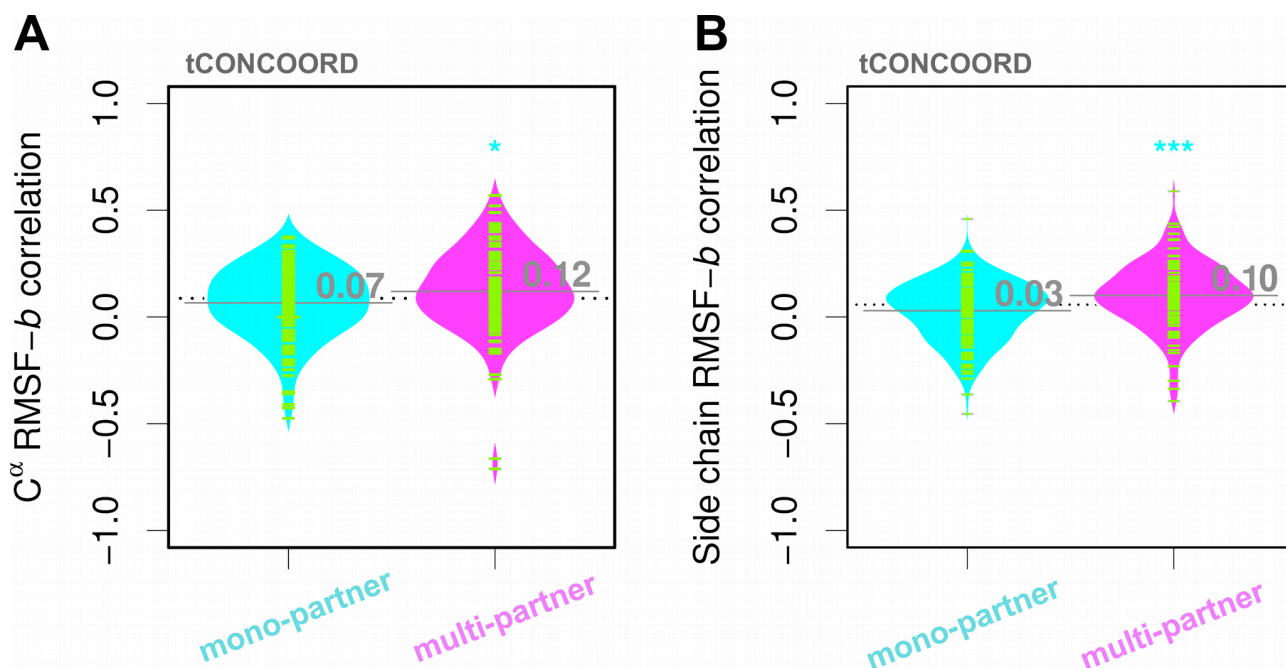

**Figure S5. Correlation between RMSF and binding multiplicity profiles in  $S^{\text{Full}}$ .** The distributions of correlation coefficients (Spearman) between RMSF and binding multiplicity ( $b$ ) profiles are reported as beanplots for mono-partner (cyan) and multi-partner (magenta) proteins, using  $C^\alpha$  (A) and side chain (B) RMSF values from tCONCOORD ensembles. Only exposed residues were considered in the calculation of the correlation coefficient. The averages of the total and of the single distributions are indicated with dotted black and solid grey lines, respectively. Individual observations are represented as green lines. The numeric values of the averages are also reported in grey for each distribution. The significance levels from a Wilcoxon comparison test between the mono- and multi-partner distributions are reported with a star code (see Figure 2 legend).

|           |        |         |      |          |       |       |
|-----------|--------|---------|------|----------|-------|-------|
| KFC2b     | 0.49   | 0.69    | 0.38 | 0.85     | 0.93  |       |
| KFC2a     | 0.43   | 0.54    | 0.35 | 0.63     |       | 0.48  |
| HotPoint  | 0.37   | 0.48    | 0.28 |          | 0.68  | 0.47  |
| X<br>PISA | 0.66   | 0.71    |      | 0.55     | 0.73  | 0.41  |
| ROBETTA   | 0.52   |         | 0.42 | 0.55     | 0.67  | 0.44  |
| ANCHOR    |        | 0.58    | 0.44 | 0.48     | 0.6   | 0.35  |
|           | ANCHOR | ROBETTA | PISA | HotPoint | KFC2a | KFC2b |
|           |        |         | Y    |          |       |       |

**Figure S6. Pairwise comparison of hotspot prediction methods.** The overlap between pairs of methods (X, Y) is calculated as the ratio between the number of residues classified as hotspots by both methods and the number of residues classified as hotspots by the X method. The overlap values are reported in red, while the cells are colored according to the overlap from blue (0.0) to red (1.0).



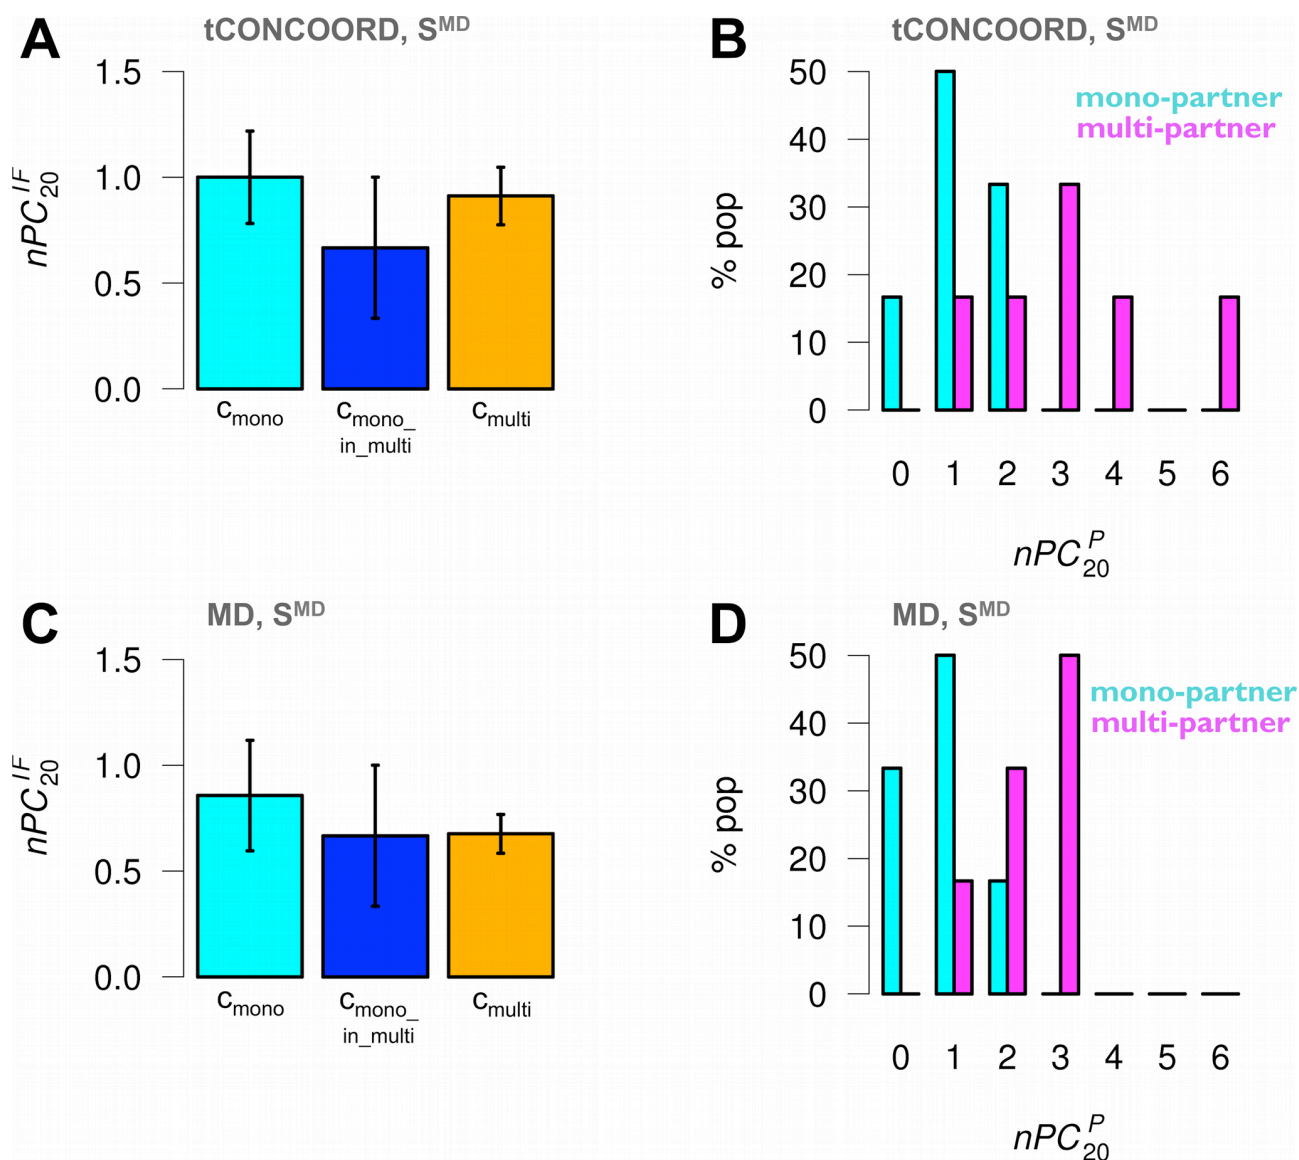

**Figure S7. Analysis of correlated motions in S<sup>MD</sup>.** The correlation between collective motions and interfaces is analysed by functional mode analysis (FMA) on tCONCOORD and MD ensembles of the S<sup>MD</sup> dataset. (A/C) Number of tCONCOORD (A) and MD (C) PCs accounting for at least 20% of the  $R_g^{IF}$  variance of a given interface ( $nPC_{20}^{IF}$ ). Average values calculated over interfaces of the three binding classes c<sub>mono1</sub> (cyan), c<sub>mono\_in\_multi</sub> (blue) and c<sub>multi</sub> (orange) are reported. The standard error of the mean is represented with an error bar. The significance levels from pair-wise Wilcoxon comparison tests are reported with a star code (see Figure 2 legend). (B/D) Distributions of tCONCOORD (B) and MD (D) nPC<sub>20</sub> per protein ( $nPC_{20}^P$ ), calculated as the number of unique PCs accounting for at least 20% of the  $R_g^{IF}$  variance of any interface in the protein. Values for mono-partner (cyan) and multi-partner (magenta) proteins are reported.

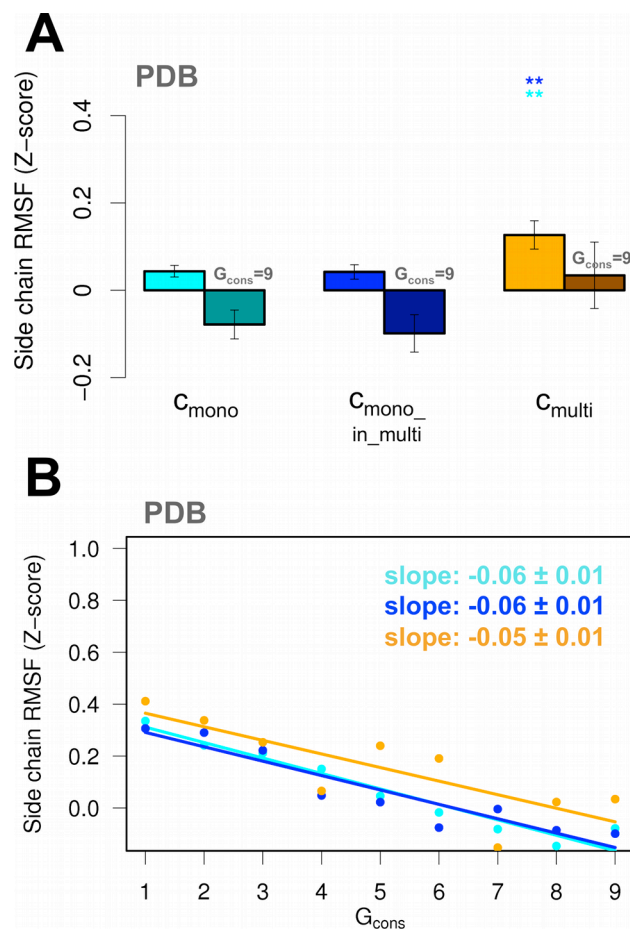

**Figure S8. Analysis of the conformational variability within PDB ensembles in  $S^{\text{Full}}$  (side chains).** (A) Average side chain RMSF Z-scores (PDB ensembles) calculated over  $c_{\text{mono}}$  (cyan),  $c_{\text{mono\_in\_multi}}$  (blue) and  $c_{\text{multi}}$  (orange) residues in the  $S^{\text{Full}}$  dataset. The standard error of the mean is represented with an error bar. The significance levels from pair-wise Wilcoxon comparison tests are reported with a star code (see Figure 2 legend). Averages and significance levels calculated considering only the residues with the highest ConSurf conservation grade ( $G_{\text{cons}} = 9$ ) are also reported in dark colours. (B) Dependence of PDB average side chain RMSF Z-scores (dots) from evolutionary conservation for  $c_{\text{mono}}$  (cyan),  $c_{\text{mono\_in\_multi}}$  (blue),  $c_{\text{multi}}$  (orange) residues. Residues are partitioned into 9 groups according to their ConSurf conservation grade ( $G_{\text{cons}}$ ). A best-fit linear regression is also reported for each binding class.

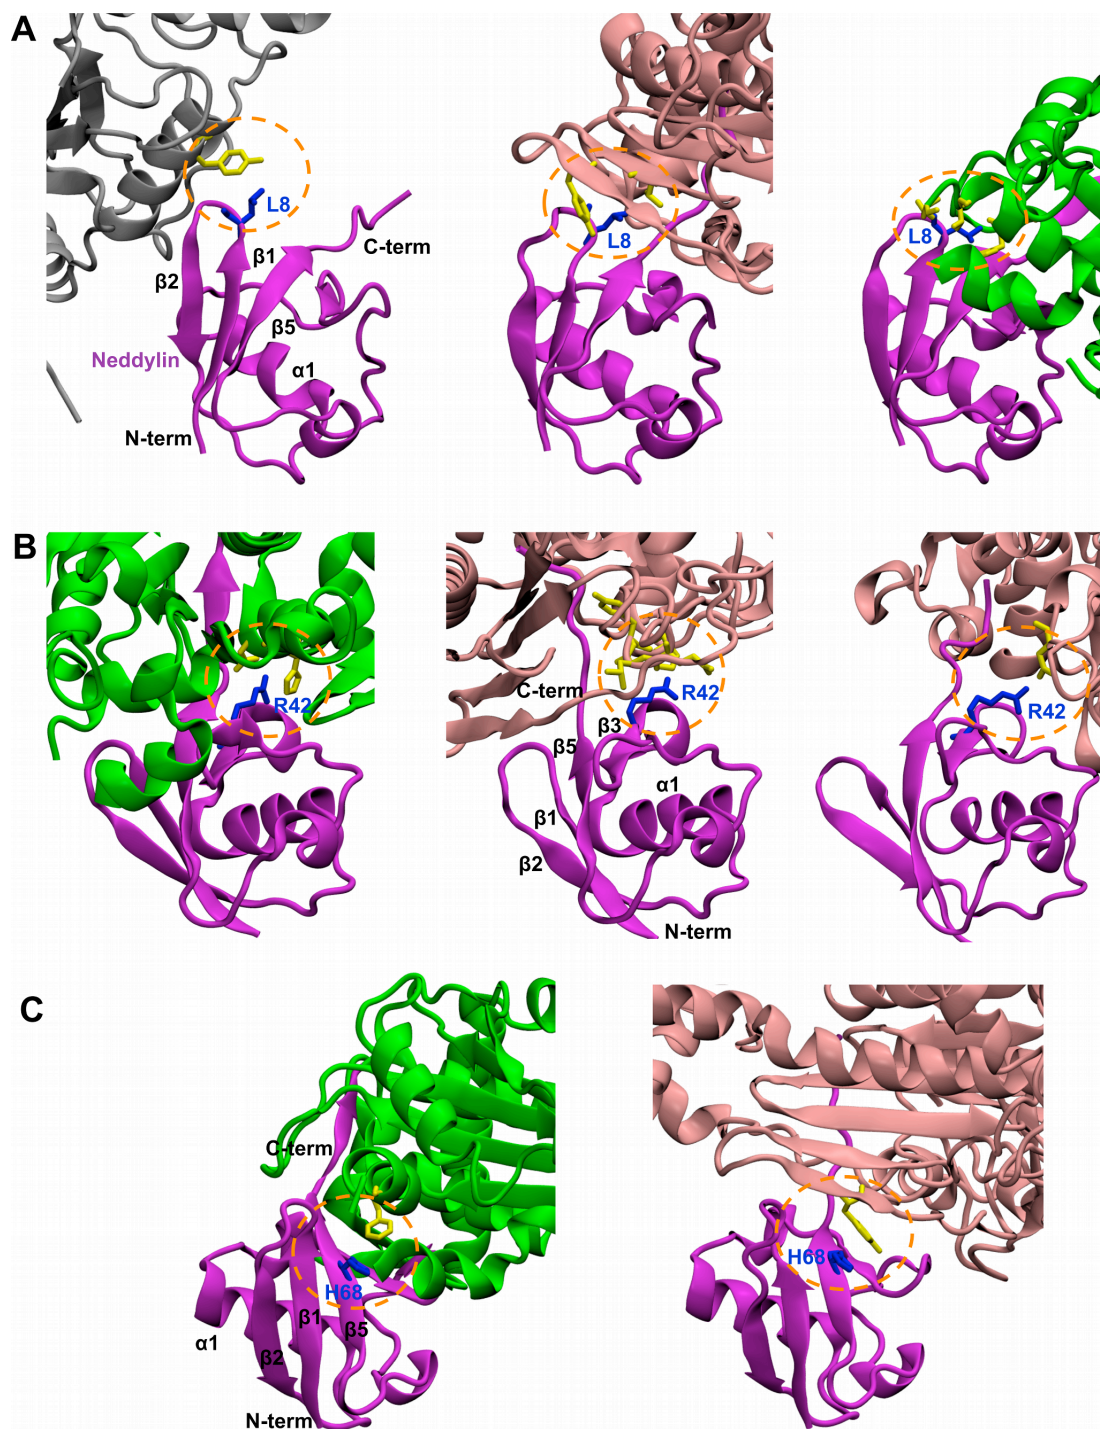

**Figure S9. Examples of multi-partner residues in Neddylin.** Cartoon representation of the complexes between Neddylin (magenta) and selected partners (NEDD8-conjugating enzyme Ubc12 in grey from PDB ID 2nvu, chain J; NEDD8-activating enzyme E1 regulatory subunit in pink from PDB ID 1r4n, chain B, and from PDB ID 2nvu, chain A; sentrin-specific protease 8 in green from PDB ID 1xt9, chain A). The three panels highlight the conformations adopted in the different complexes by L8 (A), R42 (B) and H68 (C), represented as blue sticks. In each panel, the partner residues within 4.0 Å from any atom of the highlighted Neddylin residue are represented as yellow sticks.

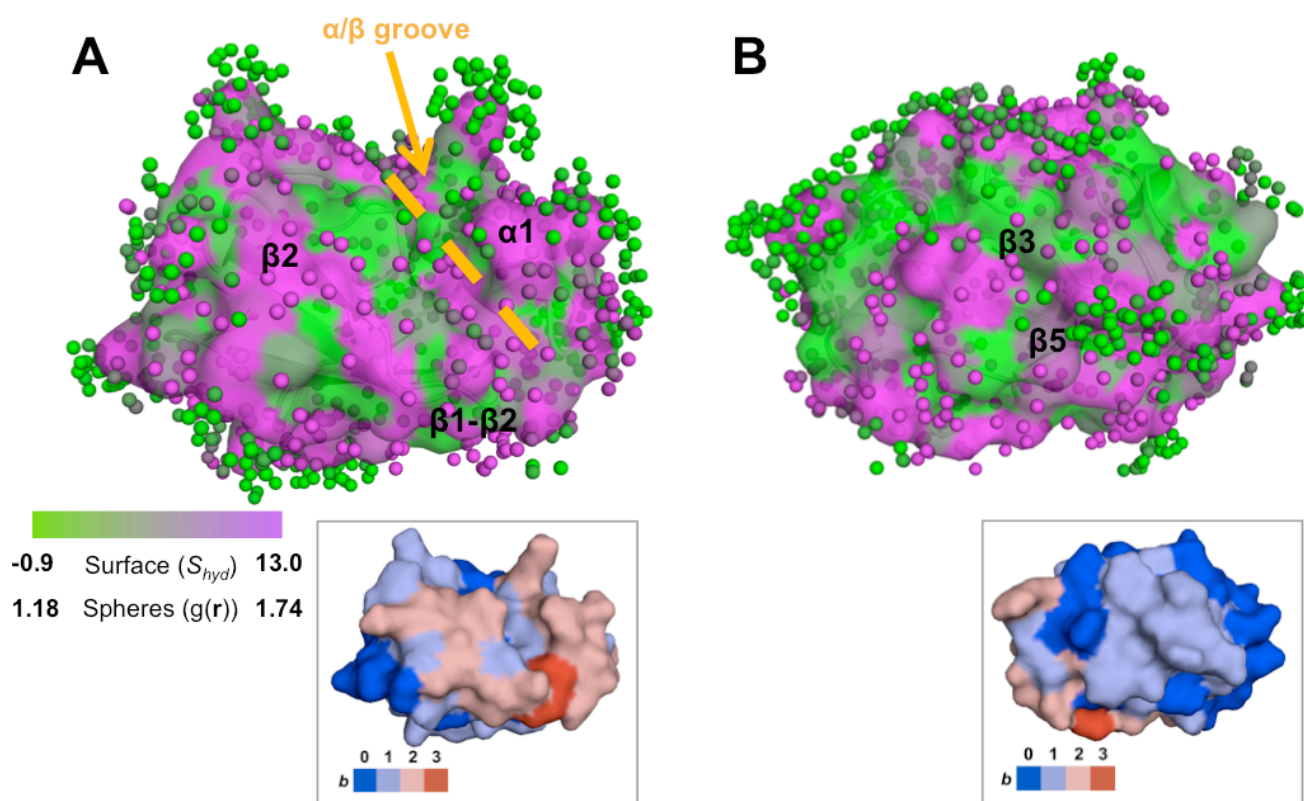

**Figure S10. Water distribution around the SUMO-2 protein.** The local maxima (hydration sites) of the water density map used for the calculation of the hydration score  $S_{hyd}$  are represented as spheres, coloured from green to magenta according to the increasing  $g(\mathbf{r})$  value. The protein surface is coloured from green to magenta according to the increasing hydration score. Hydrophobic atoms (green surface) have low hydration scores and are poor in hydration sites. The colour scale used for  $S_{hyd}$  (surface) and  $g(\mathbf{r})$  (spheres) is reported on the left. Two different orientations are shown, highlighting the multi-partner (A) and mono-partner (B) side of the molecule. The binding multiplicity is colour-mapped onto each side in the two insets.

## II. Supplementary Tables

**Table S1.** List of the 251 proteins in the S<sup>Full</sup> dataset.

| FR <sup>a</sup> | SR <sup>b</sup> | Protein Name                                                               | np <sub>s</sub> <sup>c</sup> | nres <sup>d</sup> | resol <sup>e</sup> | SCOP class |
|-----------------|-----------------|----------------------------------------------------------------------------|------------------------------|-------------------|--------------------|------------|
| 1ewdA           | 1aldA           | Fructose-1,6-bisphosphate aldolase                                         | 1                            | 363               | 2                  | c          |
| 1d2fA           | 1d2fA           | Modulator in mal gene expression, MalY                                     | 1                            | 361               | 2.5                | c          |
| 1ck2A           | 1nmuD           | Eukaryotic ribosomal protein L30 (L30e)                                    | 1                            | 103               | 2.31               | d          |
| 1orjA           | 1orjD           | Flagellar export chaperone FliS                                            | 1                            | 125               | 2.25               | a          |
| 3c62A           | 256bB           | Cytochrome b562                                                            | 1                            | 106               | 1.4                | a          |
| 1n9sA           | 1n9rG           | Small nuclear ribonucleoprotein F, Smf                                     | 1                            | 68                | 2.8                | b          |
| 1etkA           | 1f36B           | FIS protein                                                                | 1                            | 89                | 2.65               | a          |
| 1psrA           | 1psrB           | Calcyclin (S100)                                                           | 1                            | 100               | 1.05               | a          |
| 1dhrA           | 1hdrA           | Dihydropteridin reductase (pteridine reductase)                            | 1                            | 236               | 2.5                | c          |
| 1otkA           | 1otkB           | Phenylacetic acid degradation protein PaaC                                 | 1                            | 242               | 2                  | a          |
| 1gg1A           | 1n8fD           | 3-deoxy-D-arabino-heptulosonate-7-phosphate synthase (DAHP synthase, AroG) | 1                            | 343               | 1.75               | c          |
| 2av6A           | 1l5wB           | Maltodextrin phosphorylase (MALP)                                          | 1                            | 796               | 1.8                | c          |
| 1i1rB           | 1i1rB           | Interleukin-6                                                              | 1                            | 167               | 2.4                | a          |
| 2bsxA           | 1q1gF           | Putative uridine phosphorylase                                             | 1                            | 243               | 2.02               | c          |
| 2a78B           | 2c8eE           | MONO-ADP-RIBOSYLTRANSFERASE C3                                             | 1                            | 200               | 1.6                | d          |
| 1bsvA           | 1e6uA           | GDP-4-keto-6-deoxy-d-mannose epimerase/reductase (GDP-fucose synthetase)   | 1                            | 315               | 1.45               | c          |
| 1a4pA           | 1a4pA           | Calcyclin (S100)                                                           | 1                            | 92                | 2.25               | a          |
| 1x8dA           | 1x8dD           | L-rhamnose mutarotase YiiL                                                 | 1                            | 104               | 1.8                | d          |
| 1i7fA           | 1hw7A           | Heat shock protein 33, Hsp33                                               | 1                            | 229               | 2.2                | d          |
| 1fjjA           | 1fjjA           | Hypothetical protein YbhB                                                  | 1                            | 153               | 1.66               | b          |
| 1surA           | 1surA           | Phosphoadenylyl sulphate (PAPS) reductase                                  | 1                            | 215               | 2                  | c          |
| 2incC           | 2incC           | Toluene, o-xylene monooxygenase oxygenase subunit TouB                     | 1                            | 83                | 1.85               | d          |
| 2i3sA           | 1yfqa           | Cell cycle arrest protein BUB3                                             | 1                            | 342               | 1.1                | b          |
| 1g57A           | 1iezA           | 3,4-dihydroxy-2-butanone 4-phosphate synthase, DHBP synthase, RibB         | 1                            | 217               | NMR                | d          |
| 1eu5A           | 1euwA           | Deoxyuridine 5'-triphosphate nucleotidohydrolase (dUTPase)                 | 1                            | 135               | 1.05               | b          |
| 2dgkA           | 2dgkF           | Glutamate decarboxylase beta                                               | 1                            | 438               | 1.9                | c          |
| 1cgqA           | 1gd0C           | Microphage migration inhibition factor (MIF)                               | 1                            | 118               | 1.5                | d          |
| 1cviA           | 1nd6D           | Prostatic acid phosphatase                                                 | 1                            | 342               | 2.4                | c          |
| 1ixnA           | 1m5wH           | Pyridoxine 5'-phosphate synthase                                           | 1                            | 242               | 1.96               | c          |
| 1aroL           | 1aroL           | Bacteriophage T7 lysozyme (Zn amidase)                                     | 1                            | 149               | 2.8                | d          |
| 2g46A           | 2g46B           | Viral histone H3 Lysine 27 Methyltransferase                               | 1                            | 119               | NMR                | b          |
| 1dfgA           | 1qsgG           | Enoyl-ACP reductase                                                        | 1                            | 259               | 1.75               | c          |
| 1xviA           | 1xviB           | Putative mannosyl-3-phosphoglycerate phosphatase MPPG (YedP)               | 1                            | 234               | 2.26               | c          |
| 1aiuA           | 2ifqB           | Thioredoxin                                                                | 1                            | 105               | 1.2                | c          |

|       |       |                                                                   |   |     |      |   |
|-------|-------|-------------------------------------------------------------------|---|-----|------|---|
| 1av8A | 1mxrB | Ribonucleotide reductase R2                                       | 1 | 339 | 1.42 | a |
| 1eo6A | 1eo6A | Golgi-associated ATPase enhancer of 16 kD, Gate-16                | 1 | 116 | 1.8  | d |
| 1qvva | 1rw7A | Hypothetical protein Ydr533Cp                                     | 1 | 235 | 1.8  | c |
| 1b4uA | 1bouC | LigA subunit of an aromatic-ring-opening dioxygenase LigAB        | 1 | 132 | 2.2  | a |
| 1a99A | 1a99D | Putrescine receptor (PotF)                                        | 1 | 341 | 2.2  | c |
| 2hj9A | 1jx6A | Quorum-sensing signal (autoinducer-2) binding protein LuxP        | 1 | 338 | 1.5  | c |
| 1wmiB | 1wmiD | Hypothetical protein PHS014                                       | 1 | 61  | 2.3  | a |
| 1izyA | 1n57A | HSP31 (HchA; YedU)                                                | 1 | 272 | 1.6  | c |
| 2e98A | 1uehB | Undecaprenyl diphosphate synthase                                 | 1 | 225 | 1.73 | c |
| 2ae0X | 2ae0X | Membrane-bound lytic murein transglycosylase A, MLTA              | 1 | 335 | 2    | b |
| 1hnoA | 1k39B | Dienoyl-CoA isomerase (delta3-delta2-enoyl-CoA isomerase)         | 1 | 271 | 3.29 | c |
| 3c4oB | 2g2uB | beta-lactamase-inhibitor protein, BLIP                            | 1 | 165 | 1.6  | d |
| 1cmaA | 1cmcB | Met repressor, MetJ (MetR)                                        | 1 | 104 | 1.8  | a |
| 2bdxA | 1jk7A | Protein phosphatase-1 (PP-1)                                      | 1 | 294 | 1.9  | d |
| 1af6A | 1af6C | Maltoporin (also LamB protein)                                    | 1 | 421 | 2.4  | f |
| 2qw7A | 2qw7J | Carbon dioxide concentrating mechanism protein CcmL               | 1 | 96  | 2.4  | b |
| 2d5rA | 2d5rA | CCR4-NOT transcription complex subunit 7, CAF1                    | 1 | 252 | 2.5  | c |
| 1c0nA | 1jf9A | NifS-like protein/selenocysteine lyase                            | 1 | 405 | 2    | c |
| 2cluA | 2cihA | FERRITIN HEAVY CHAIN                                              | 1 | 172 | 1.5  | a |
| 1b91A | 1b91H | 7,8-dihydroneopterin triphosphate epimerase                       | 1 | 119 | 2.9  | d |
| 1hslA | 1hslB | Histidine-binding protein                                         | 1 | 239 | 1.89 | c |
| 1bh5A | 1qipD | Glyoxalase I (lactoylglutathione lyase)                           | 1 | 183 | 1.72 | d |
| 1ex6A | 1ex7A | Guanylate kinase                                                  | 1 | 186 | 1.9  | c |
| 1bykA | 1bykB | Trehalose repressor, C-terminal domain                            | 1 | 255 | 2.5  | c |
| 1r5tA | 1r5tD | mono-domain cytidine deaminase                                    | 1 | 134 | 2    | c |
| 1gynA | 1dosB | Fructose-bisphosphate aldolase (FBP aldolase)                     | 1 | 358 | 1.67 | c |
| 1dhsA | 1rozA | Deoxyhypusine synthase, DHS                                       | 1 | 336 | 2.21 | c |
| 1cb7A | 1ccwC | Glutamate mutase, small subunit                                   | 1 | 137 | 1.6  | c |
| 1ga7A | 1g0sB | ADP-ribose pyrophosphatase                                        | 1 | 202 | 1.9  | d |
| 1jdiA | 1k0wF | L-ribulose-5-phosphate 4-epimerase                                | 1 | 223 | 2.1  | c |
| 2avyD | 2qanD | Ribosomal protein S4                                              | 1 | 205 | 3.21 | d |
| 2avyM | 2qanM | Ribosomal protein S13                                             | 1 | 113 | 3.21 | a |
| 2avyL | 2qanL | Ribosomal protein S12                                             | 1 | 123 | 3.21 | b |
| 2avyO | 2qanO | 30S ribosomal protein S15                                         | 1 | 88  | 3.21 | a |
| 1fwqA | 1fwqA | RabGEF Mss4                                                       | 1 | 115 | NMR  | b |
| 2c4nA | 2c4nA | NagD                                                              | 1 | 250 | 1.8  | c |
| 1ejcA | 1uaeA | UDP-N-acetylglucosamine enolpyruvyl transferase (EPT, MurA, MurZ) | 1 | 418 | 1.8  | d |
| 2cf2E | 1q7bD | beta-keto acyl carrier protein reductase                          | 1 | 243 | 2.05 | c |
| 1euiC | 1ugiH | Uracil-DNA glycosylase inhibitor protein                          | 1 | 83  | 1.55 | d |

|       |       |                                                              |   |     |      |   |
|-------|-------|--------------------------------------------------------------|---|-----|------|---|
| 2e2dC | 2e2dC | TIMP-2                                                       | 1 | 179 | 2    | b |
| 2fjcK | 2fjcL | Dodecameric ferritin homolog                                 | 1 | 151 | 2.5  | a |
| 1dzuP | 1e4cP | L-fuculose-1-phosphate aldolase                              | 1 | 206 | 1.66 | c |
| 1dqwA | 1dqwD | Orotidine 5'-monophosphate decarboxylase (OMP decarboxylase) | 1 | 267 | 2.1  | c |
| 1f5mA | 1f5mB | Hypothetical protein ykl069wp                                | 1 | 177 | 1.9  | d |
| 1l6wA | 1l6wJ | Decameric fructose-6-phosphate aldolase/transaldolase        | 1 | 220 | 1.93 | c |
| 1cddA | 1jkxB | Glycinamide ribonucleotide transformylase, GART              | 1 | 209 | 1.6  | c |
| 1f05A | 2e1dB | Transaldolase                                                | 1 | 321 | 2    | c |
| 1tuvA | 1tuvA | Hypothetical protein YgiN                                    | 1 | 103 | 1.7  | d |
| 1e8oA | 1e8oC | Signal recognition particle 9KDa protein, SRP9               | 1 | 71  | 3.2  | d |
| 1poiB | 1poiD | Glutaconate:CoA transferase beta                             | 1 | 260 | 2.5  | c |
| 1gggA | 1wdnA | Glutamine-binding protein                                    | 1 | 224 | 1.94 | c |
| 2es4A | 1tahD | Lipase                                                       | 1 | 318 | 3    | c |
| 1qsmA | 1qsmD | Histone acetyltransferase HPA2                               | 1 | 152 | 2.4  | d |
| 1oroA | 1oroA | Orotate PRTase                                               | 1 | 212 | 2.4  | c |
| 1fteA | 1fthA | Holo-(acyl carrier protein) synthase ACPS                    | 1 | 117 | 1.9  | d |
| 1d6kA | 1dfuP | Ribosomal protein L25                                        | 1 | 94  | 1.8  | b |
| 1v74B | 1v74B | Colicin D immunity protein                                   | 1 | 87  | 2    | a |
| 2c0aA | 2c0aC | KDPG aldolase                                                | 1 | 213 | 1.55 | c |
| 1a03A | 1k96A | Calcyclin (S100)                                             | 1 | 89  | 1.44 | a |
| 1qsdA | 1qsdB | Tubulin chaperone cofactor A                                 | 1 | 102 | 2.2  | a |
| 1s5uA | 1s5uE | Hypothetical protein YbgC                                    | 1 | 136 | 1.7  | d |
| 2hiqA | 2hiqB | Hypothetical protein YdhR                                    | 1 | 96  | 2    | d |
| 1nmoA | 1nmpE | Hypothetical protein Ybgl                                    | 1 | 247 | 2.2  | c |
| 1ajaA | 1y6vB | Alkaline phosphatase                                         | 1 | 449 | 1.6  | c |
| 1erbA | 1jydA | Retinol binding protein                                      | 1 | 174 | 1.7  | b |
| 1pugA | 1pugA | Hypothetical upf0133 protein YbaB                            | 1 | 94  | 2.2  | d |
| 1lasA | 12asB | Asparagine synthetase                                        | 1 | 328 | 2.2  | d |
| 1bs1A | 1byiA | Dethiobiotin synthetase                                      | 1 | 224 | 0.97 | c |
| 2aw4Z | 2awbZ | Ribosomal protein L31p                                       | 1 | 70  | 3.46 | d |
| 1n2zA | 1n2zB | Vitamin B12 binding protein BtuF                             | 1 | 245 | 2    | c |
| 1dj0A | 1dj0B | Pseudouridine synthase I TruA                                | 1 | 264 | 1.5  | d |
| 1av5A | 1kpfA | Protein kinase C inhibitor-1, PKCI-1                         | 1 | 111 | 1.5  | d |
| 1cl1A | 2fq6B | Cystathionine beta-lyase, CBL                                | 1 | 392 | 1.78 | c |
| 1p91A | 1p91A | rRNA methyltransferase RlmA                                  | 1 | 261 | 2.8  | c |
| 1bd9A | 1behB | Phosphatidylethanolamine binding protein, PEBP               | 1 | 183 | 1.75 | b |
| 2cmjA | 1t0lD | NADP-dependent isocitrate dehydrogenase                      | 1 | 414 | 2.41 | c |
| 2ht0A | 1owfA | Integration host factor alpha subunit (IHFA)                 | 1 | 96  | 1.95 | a |
| 1ai2A | 1pb3A | Isocitrate dehydrogenase, ICDH                               | 1 | 416 | 1.7  | c |
| 1jn5A | 1jkgA | NTF2-related export protein 1 (p15)                          | 1 | 139 | 1.9  | d |
| 1cksA | 1cksA | CksHs2                                                       | 1 | 74  | 2.1  | d |
| 1itqA | 1ituB | Renal dipeptidase                                            | 1 | 369 | 2    | c |

|       |       |                                                                    |    |     |      |   |
|-------|-------|--------------------------------------------------------------------|----|-----|------|---|
| 3cptB | 3cptB | Mitogen-activated protein-binding protein-interacting protein      | 1  | 116 | 1.9  | d |
| 1k4kA | 1k4mC | Nicotinamide mononucleotide (NMN) adenylyltransferase              | 1  | 213 | 1.9  | c |
| 1xouB | 1xouB | EspA chaperone CsaA                                                | 1  | 84  | 2.8  | a |
| 1yacA | 1yacB | YcaC                                                               | 1  | 204 | 1.8  | c |
| 2bnfA | 2bndA | Uridylate kinase PyrH                                              | 1  | 237 | 2.6  | c |
| 1lbqA | 1lbqB | Ferrochelatase                                                     | 1  | 354 | 2.4  | c |
| 1cm5A | 1h16A | Pyruvate formate-lyase, PFL                                        | 1  | 759 | 1.53 | c |
| 2dznA | 2dznE | 26S proteasome non-ATPase regulatory subunit 10, gankyrin          | 1  | 227 | 2.2  | d |
| 1lxaA | 2qiaA | UDP N-acetylglucosamine acyltransferase                            | 1  | 262 | 1.74 | b |
| 1y0gA | 1y0gD | Lipid binding protein YceI                                         | 1  | 169 | 2.2  | b |
| 2f93A | 1h2sA | Sensory rhodopsin II                                               | 1  | 225 | 1.93 | f |
| 1b6tA | 1qjcB | Phosphopantetheine adenylyltransferase                             | 1  | 157 | 1.64 | c |
| 2g1aA | 2b82B | Class B acid phosphatase, AphA                                     | 1  | 211 | 1.25 | c |
| 2b95A | 1z09A | Dynein light chain 2A, cytoplasmic                                 | 1  | 96  | NMR  | d |
| 1wpbA | 1wpbM | Hypothetical protein YfbU                                          | 1  | 167 | 2    | a |
| 2i2tX | 2qaoZ | Ribosomal protein L28 (L28p)                                       | 1  | 77  | 3.21 | d |
| 2a0wA | 3bgsA | Purine nucleoside phosphorylase, PNP                               | 1  | 286 | 2.1  | c |
| 1keyA | 1j1jD | Translin                                                           | 1  | 217 | 2.2  | a |
| 1gs5A | 1gs5A | N-acetyl-l-glutamate kinase                                        | 1  | 258 | 1.5  | c |
| 1eumA | 1eumF | Non-hem ferritin                                                   | 1  | 161 | 2.05 | a |
| 1ynfA | 1ynhD | Succinylarginine dihydrolase                                       | 1  | 439 | 1.95 | d |
| 1fuoA | 1furA | Fumarase                                                           | 1  | 456 | 1.95 | a |
| 1b09A | 1b09E | C-reactive protein (CRP)                                           | 1  | 206 | 2.5  | b |
| 2b2kA | 1hztA | Isopentenyl diphosphate isomerase                                  | 1  | 153 | 1.45 | d |
| 2esfA | 1i6pA | beta-carbonic anhydrase                                            | 1  | 214 | 2    | c |
| 1bxiA | 2vlqA | ImmE9 protein (Im9)                                                | 1  | 84  | 1.6  | a |
| 1uhnA | 2zfdA | Calcineurin B-like protein 2                                       | 1  | 183 | 1.2  | a |
| 2ca6A | 2ca6B | Rna1p (RanGAP1), N-terminal domain                                 | 1  | 344 | 2.2  | c |
| 1dj7B | 1dj7B | Ferredoxin thioredoxin reductase (FTR), alpha (variable) chain     | 1  | 73  | 1.6  | b |
| 2pcdA | 3pcgF | Protocatechuate-3,4-dioxygenase, alpha chain                       | 1  | 200 | 1.96 | b |
| 1vetA | 1vetA | MEK binding partner 1, MP1                                         | 1  | 122 | 1.9  | d |
| 1go3F | 1go3N | RNA polymerase II subunit RBP4 (RpoF)                              | 1  | 106 | 1.75 | a |
| 1n4pB | 1n4qL | Protein farnesyltransferase, beta-subunit                          | 1  | 346 | 2.4  | a |
| 1ek5A | 1ek6B | Uridine diphosphogalactose-4-epimerase (UDP-galactose 4-epimerase) | 1  | 345 | 1.5  | c |
| 2bkqA | 2bkrA | Sentrin-specific protease 8, SENP8                                 | 1  | 212 | 1.9  | d |
| 1bwpA | 1es9A | Platelet-activating factor acetylhydrolase                         | 1  | 212 | 1.3  | c |
| 2bkuA | 1wa5A | Ran                                                                | 10 | 170 | 2    | c |
| 1a4rA | 2ngrA | CDC42                                                              | 11 | 191 | 1.9  | c |
| 2av1B | 1k5nB | beta2-microglobulin                                                | 12 | 99  | 1.09 | b |
| 1il6A | 1il6A | Interleukin-6                                                      | 2  | 166 | NMR  | a |
| 1eg9B | 1o7nB | Naphthalene 1,2-dioxygenase beta subunit                           | 2  | 193 | 1.4  | d |



|       |       |                                                                |   |     |      |   |
|-------|-------|----------------------------------------------------------------|---|-----|------|---|
| 1i2mB | 1a12C | Regulator of chromosome condensation RCC1                      | 2 | 401 | 1.7  | b |
| 1ar0A | 1gy6B | Nuclear transport factor-2 (NTF2)                              | 2 | 123 | 1.6  | d |
| 3eipA | 3eipB | Colicin E3 immunity protein                                    | 2 | 84  | 1.8  | d |
| 1xrsA | 1xrsA | D-lysine 5,6-aminomutase alpha subunit, KamD                   | 2 | 516 | 2.8  | c |
| 1azzC | 1ifgA | Ecotin, trypsin inhibitor                                      | 2 | 140 | 2    | b |
| 1dj1A | 2eutA | Cytochrome c peroxidase, CCP                                   | 2 | 291 | 1.12 | a |
| 2incB | 2incB | Toluene, o-xylene monooxygenase oxygenase subunit TouE         | 2 | 322 | 1.85 | a |
| 1nbwB | 1nbwD | Glycerol dehydratase reactivase, beta subunit                  | 2 | 113 | 2.4  | c |
| 1ni4A | 2ozlC | E1-beta subunit of pyruvate dehydrogenase (PP module)          | 2 | 361 | 1.9  | c |
| 1b4uB | 1bouD | LigB subunit of an aromatic-ring-opening dioxygenase LigAB     | 2 | 298 | 2.2  | c |
| 1wmiA | 1wmiC | Hypothetical protein PHS013                                    | 2 | 88  | 2.3  | d |
| 3b6fD | 1kx5H | Histone H2B                                                    | 2 | 121 | 1.94 | a |
| 1c48A | 1dm0K | Verotoxin-1/shiga-toxin, B-pentamer                            | 2 | 69  | 2.5  | b |
| 1f17B | 1xwdE | Follicle stimulating hormone, follitropin, beta chain          | 2 | 105 | 2.92 | g |
| 1jwhC | 1rqfJ | Casein kinase II beta subunit                                  | 2 | 173 | 2.89 | g |
| 3cirD | 1kf6P | Fumarate reductase subunit FrdD                                | 2 | 119 | 2.7  | f |
| 2hyeD | 1ldjB | RIGG-box protein 1 (RBX1) of SCF ubiquitin ligase complex      | 2 | 88  | 3    | g |
| 2avyG | 2qanG | Ribosomal protein S7                                           | 2 | 152 | 3.21 | a |
| 2avyI | 2qanI | Ribosomal protein S9                                           | 2 | 127 | 3.21 | d |
| 2avyQ | 2qanQ | Ribosomal protein S17                                          | 2 | 81  | 3.21 | b |
| 2avyS | 2qanS | Ribosomal protein S19                                          | 2 | 80  | 3.21 | d |
| 1jr5A | 1jr5B | Anti-sigma factor AsiA                                         | 2 | 90  | NMR  | a |
| 1qo0A | 1peaA | Amide receptor/negative regulator of the amidase operon (AmiC) | 2 | 368 | 2.1  | c |
| 3biiD | 1fm0D | Molybdopterin synthase subunit MoaD                            | 2 | 81  | 1.45 | d |
| 3biiE | 1nvjB | Molybdopterin synthase subunit MoaE                            | 2 | 126 | 2.15 | d |
| 3b9uA | 1rg8B | Acidic FGF (FGF1)                                              | 2 | 141 | 1.1  | b |
| 1djrD | 1djrH | Heat-labile toxin                                              | 2 | 103 | 1.3  | b |
| 1jyoA | 1jyoB | Virulence effector SptP secretion chaperone SicP               | 2 | 130 | 1.9  | d |
| 1f3cA | 1cmiA | Dynein light chain 1 (DLC1)                                    | 2 | 85  | 2.5  | d |
| 1c54A | 1lniB | RNase Sa                                                       | 2 | 96  | 1    | d |
| 1a0uA | 2dn2C | Hemoglobin, alpha-chain                                        | 2 | 141 | 1.25 | a |
| 1aonO | 1svtU | Chaperonin-10 (GroES)                                          | 2 | 97  | 2.81 | b |
| 1is7K | 1jg5E | GTP cyclohydrolase I feedback regulatory protein, GFRP         | 2 | 83  | 2.6  | d |
| 1b6bA | 1kuxA | Serotonin N-acetyltransferase                                  | 2 | 166 | 1.8  | d |
| 1cb7B | 1ccwD | Glutamate mutase, large subunit                                | 2 | 483 | 1.6  | c |
| 2d1pB | 2d1pB | tRNA 2-thiouridine synthesizing protein C, TusC                | 2 | 119 | 2.15 | c |
| 2avuA | 1g8eA | Flagellar transcriptional activator FlhD                       | 2 | 98  | 1.8  | a |
| 1fq1A | 1fpzB | Kinase associated phosphatase (kap)                            | 2 | 176 | 2    | c |

|       |       |                                                                       |   |     |      |   |
|-------|-------|-----------------------------------------------------------------------|---|-----|------|---|
| 1kqfC | 1kqfC | Formate dehydrogenase N, cytochrome (gamma) subunit                   | 2 | 216 | 1.6  | f |
| 1dvcA | 1cyvA | Cystatin A (stefin A)                                                 | 2 | 98  | NMR  | d |
| 2f0yB | 2h6fB | Protein farnesyltransferase, beta-subunit                             | 2 | 410 | 1.5  | a |
| 1egmB | 1eexE | Diol dehydratase, beta subunit                                        | 2 | 178 | 1.7  | c |
| 2b9aA | 1f86B | Transthyretin (synonym: prealbumin)                                   | 2 | 115 | 1.1  | b |
| 2awb3 | 2qao3 | Ribosomal protein L35p                                                | 2 | 64  | 3.21 | d |
| 1go4A | 2vfxE | MITOTIC SPINDLE ASSEMBLY CHECKPOINT PROTEIN MAD2A                     | 2 | 205 | 1.95 | d |
| 1mvfD | 1ub4C | MazE                                                                  | 2 | 75  | 1.7  | b |
| 1e9jA | 1xwdD | Glycoprotein hormones alpha chain (Gonadotropin A, Follitropin alpha) | 3 | 87  | 2.92 | g |
| 2aczD | 1nekD | Succinate dehydrogenase subunit SdhD                                  | 3 | 113 | 2.6  | f |
| 2aczC | 1nekC | Succinate dehydrogenase subunit SdhC                                  | 3 | 129 | 2.6  | f |
| 2incA | 2incA | Toluene, o-xylene monooxygenase oxygenase subunit TouA                | 3 | 491 | 1.85 | a |
| 1l1oA | 2pi2G | Replication protein A 14 KDa (RPA14) subunit                          | 3 | 118 | 2    | b |
| 3b6fA | 1kx5E | Histone H3                                                            | 3 | 135 | 1.94 | a |
| 1f3hA | 2qfaA | Anti-apoptotic protein survivin                                       | 3 | 137 | 1.4  | g |
| 1bksB | 1qopB | Tryptophan synthase, beta-subunit                                     | 3 | 390 | 1.4  | c |
| 1mkfA | 1mkfB | Viral chemokine binding protein m3                                    | 3 | 371 | 2.1  | b |
| 3cirC | 1kf6O | Fumarate reductase subunit FrdC                                       | 3 | 130 | 2.7  | f |
| 2avyH | 1s03H | Ribosomal protein S8                                                  | 3 | 127 | 2.7  | d |
| 2avyK | 2qanK | Ribosomal protein S11                                                 | 3 | 117 | 3.21 | c |
| 2avyJ | 2qanJ | Ribosomal protein S10                                                 | 3 | 98  | 3.21 | d |
| 1b2uF | 1ay7B | Barstar (barnase inhibitor)                                           | 3 | 89  | 1.7  | c |
| 1l0oA | 1thnC | Anti-sigma factor spoIIab                                             | 3 | 136 | 2.5  | d |
| 1b3uA | 1b3uB | Constant regulatory domain of protein phosphatase 2a, pr65alpha       | 3 | 588 | 2.3  | a |
| 3bdm0 | 1z7qN | Proteasome beta subunit (catalytic)                                   | 3 | 233 | 3.22 | d |
| 2vglS | 2vglS | AP1 clathrin adaptor core                                             | 3 | 142 | 2.59 | i |
| 1a4oA | 2o02B | zeta isoform                                                          | 3 | 230 | 1.5  | a |
| 2b63J | 1twfJ | RNA polymerase subunit RPB10                                          | 3 | 65  | 2.3  | a |
| 2bbkH | 2bbkJ | Methylamine dehydrogenase, H-chain                                    | 3 | 355 | 1.75 | b |
| 1fntF | 1rypT | Proteasome alpha subunit (non-catalytic)                              | 4 | 233 | 1.9  | d |
| 3bdmA | 1rypB | Proteasome alpha subunit (non-catalytic)                              | 4 | 250 | 1.9  | d |
| 3bdmG | 1rypO | Proteasome alpha subunit (non-catalytic)                              | 4 | 243 | 1.9  | d |
| 3bdmJ | 1z7qY | Proteasome beta subunit (catalytic)                                   | 4 | 198 | 3.22 | d |
| 3bdmI | 1z7qX | Proteasome beta subunit (catalytic)                                   | 4 | 204 | 3.22 | d |
| 3bdmL | 1z7qM | Proteasome beta subunit (catalytic)                                   | 4 | 222 | 3.22 | d |
| 1jb0D | 1jb0D | Photosystem I subunit Psad                                            | 4 | 138 | 2.5  | d |
| 2b90A | 2d48A | Interleukin-4                                                         | 4 | 129 | 1.65 | a |
| 2b63K | 1twfK | RPB11                                                                 | 4 | 114 | 2.3  | d |
| 2ckhB | 1wm3A | SUMO-2                                                                | 4 | 72  | 1.2  | d |
| 2bkrB | 1nddD | Nedd8                                                                 | 4 | 73  | 1.6  | d |
| 3b6fC | 1tzyE | Histone H2A                                                           | 4 | 104 | 1.9  | a |

|       |       |                                                                                                 |   |     |      |   |
|-------|-------|-------------------------------------------------------------------------------------------------|---|-----|------|---|
| 1id3B | 2hueC | Histone H4                                                                                      | 4 | 82  | 1.7  | a |
| 2dyrG | 2occT | Mitochondrial cytochrome c oxidase subunit VIa                                                  | 4 | 84  | 2.3  | f |
| 1f3gA | 1f3zA | Glucose-specific factor III (glsIII)                                                            | 4 | 150 | 1.98 | b |
| 2a06J | 2a06W | Subunit X (non-heme 7 kDa protein) of cytochrome bc1 complex (Ubiquinol-cytochrome c reductase) | 4 | 62  | 2.1  | f |
| 2h24A | 2ilkA | Interleukin-10 (cytokine synthesis inhibitory factor, CSIF)                                     | 4 | 155 | 1.6  | a |
| 2dyrH | 1v54U | Cytochrome c oxidase subunit h                                                                  | 5 | 79  | 1.8  | a |
| 2hyiA | 1oo0A | Mago nashi protein                                                                              | 5 | 144 | 1.85 | d |
| 2dyrI | 1v54V | Mitochondrial cytochrome c oxidase subunit VIc                                                  | 5 | 72  | 1.8  | f |
| 2a06F | 2a06S | 14 kDa protein of cytochrome bc1 complex (Ubiquinol-cytochrome c reductase)                     | 5 | 99  | 2.1  | f |
| 1b6cA | 2ppnA | FK-506 binding protein (FKBP12), an immunophilin                                                | 5 | 107 | 0.92 | d |
| 3ezaB | 1opdA | Histidine-containing phosphocarrier protein (HPr)                                               | 6 | 85  | 1.5  | d |
| 1azfA | 2vb1A | Lysozyme                                                                                        | 6 | 129 | 0.65 | d |
| 2dyrF | 1v54S | Cytochrome c oxidase Subunit F                                                                  | 6 | 98  | 1.8  | g |
| 2a06G | 2a06T | Ubiquinone-binding protein QP-C of cytochrome bc1 complex (Ubiquinol-cytochrome c reductase)    | 6 | 76  | 2.1  | f |
| 1b9xA | 1gotB | beta1-subunit of the signal-transducing G protein heterotrimer                                  | 6 | 339 | 2    | b |
| 3cx5H | 3cx5S | Ubiquinone-binding protein QP-C of cytochrome bc1 complex (Ubiquinol-cytochrome c reductase)    | 7 | 93  | 1.9  | f |

<sup>a</sup>PDB ID + chain ID of the Family Representative (FR).

<sup>b</sup>PDB ID + chain ID of the Structural Representative (SR).

<sup>c</sup>Number of structural partners.

<sup>d</sup>Number of residues of the SR.

<sup>e</sup>X-ray resolution in Å (or 'NMR' for NMR structures).

**Table S2.** List of the 12 proteins in the S<sup>MD</sup> dataset.

| FR <sup>a</sup> | SR <sup>b</sup> | Protein                                                       | nps <sup>c</sup> | np <sup>d</sup> | SCOP class     |
|-----------------|-----------------|---------------------------------------------------------------|------------------|-----------------|----------------|
| 1orjA           | 1orjD           | Flagellar export chaperone FliS                               | 1                | 1               | $\alpha$       |
| 1v74B           | 1v74B           | Colicin D immunity protein                                    | 1                | 1               | $\alpha$       |
| 2d5rA           | 2d5rA           | CCR4-NOT transcription complex subunit 7, CAF1                | 1                | 1               | $\alpha/\beta$ |
| 3c4oB           | 2g2uB           | Beta-lactamase-inhibitor protein, BLIP                        | 1                | 1               | $\alpha+\beta$ |
| 1euiC           | 1ugiH           | Uracil-DNA glycosylase inhibitor protein                      | 1                | 1               | $\alpha+\beta$ |
| 3cptB           | 3cptB           | Mitogen-activated protein-binding protein-interacting protein | 1                | 1               | $\alpha+\beta$ |
| 2b90A           | 2d48A           | Interleukin-4                                                 | 4                | 4               | $\alpha$       |
| 1fntF           | 1rypT           | Proteasome alpha subunit (non-catalytic)                      | 4                | 31              | $\alpha+\beta$ |
| 2ckhB           | 1wm3A           | SUMO-2                                                        | 4                | 58              | $\alpha+\beta$ |
| 2hyiA           | 1oo0A           | Mago nashi protein                                            | 5                | 16              | $\alpha+\beta$ |
| 2dyrH           | 1v54U           | Cytochrome c oxidase subunit h                                | 5                | 7               | $\alpha$       |
| 2bkuA           | 1wa5A           | Ran                                                           | 10               | 22              | $\alpha/\beta$ |

<sup>a</sup>PDB ID + chain ID of the Family Representative (FR).

<sup>b</sup>PDB ID + chain ID of the Structural Representative (SR).

<sup>c</sup>Number of structural partners.

<sup>d</sup>Number of partners (Intact + PiSite).

**Table S3.** List of the 69 sociable proteins in the S<sup>Soc</sup> dataset.

| FR <sup>a</sup> | Protein Name                                                      | np, <sup>b</sup> | nres <sup>c</sup> | resol <sup>d</sup> | SCOP <sup>e</sup><br>class |
|-----------------|-------------------------------------------------------------------|------------------|-------------------|--------------------|----------------------------|
| 3bhvD           | CYCLIN-A2                                                         | 3                | 262               | 2.1                | a, a                       |
| 2pvoA           | FERREDOXIN-THIOREDOXIN REDUCTASE,<br>CATALYTICCHAIN               | 3                | 110               | 3.4                | g                          |
| 2racA           | PROTEIN (AMICYANIN)                                               | 3                | 105               | 1.3                | b                          |
| 2h9gS           | TUMOR NECROSIS FACTOR RECEPTOR<br>SUPERFAMILYMEMBER 10B PRECURSOR | 3                | 64                | 2.32               | g, g, g                    |
| 1z5yD           | THIOL:DISULFIDE INTERCHANGE PROTEIN<br>DSBD                       | 3                | 118               | 1.94               | b                          |
| 1wo2A           | ALPHA-AMYLASE, PANCREATIC                                         | 3                | 495               | 2.01               | b, c                       |
| 1kmcD           | X-LINKED INHIBITOR OF APOPTOSIS<br>PROTEIN                        | 3                | 17                | 2.9                | g                          |
| 2izvB           | TRANSCRIPTION ELONGATION FACTOR B<br>POLYPEPTIDE 2                | 3                | 105               | 2.55               | d                          |
| 3bvdB           | CYTOCHROME C OXIDASE SUBUNIT 2                                    | 3                | 166               | 3.37               | b, f                       |
| 2ntiG           | DNA POLYMERASE SLIDING CLAMP B                                    | 3                | 249               | 2.5                | NA                         |
| 1lqbC           | VON HIPPEL-LINDAU DISEASE TUMOR<br>SUPRESSOR                      | 3                | 150               | 2                  | b                          |
| 2pcxA           | CELLULAR TUMOR ANTIGEN P53                                        | 4                | 205               | 1.54               | b                          |
| 2yccA           | CYTOCHROME C                                                      | 4                | 108               | 1.9                | a                          |
| 2jixE           | ERYTHROPOIETIN RECEPTOR                                           | 4                | 216               | 3.2                | b, b                       |
| 2iadA           | MHC CLASS II I-AD                                                 | 4                | 187               | 2.4                | b, d                       |
| 1u81A           | ADP-RIBOSYLATION FACTOR 1                                         | 4                | 164               | NMR                | c                          |
| 5sicE           | SUBTILISIN BPN'                                                   | 4                | 275               | 2.2                | c                          |
| 3bpnA           | INTERLEUKIN-4                                                     | 4                | 126               | 3.02               | a                          |
| 2z6kD           | REPLICATION PROTEIN A 14 KDA SUBUNIT                              | 4                | 117               | 3                  | b                          |
| 2vpfH           | VASCULAR ENDOTHELIAL GROWTH FACTOR                                | 4                | 94                | 1.93               | g                          |
| 2o93O           | ACTOR OF ACTIVATED T-CELLS,<br>CYTOPLASMIC 2                      | 4                | 287               | 3.05               | b, b                       |
| 2nz1Y           | SMALL INDUCIBLE CYTOKINE A2                                       | 4                | 64                | 2.5                | d                          |
| 2nljC           | VOLTAGE-GATED POTASSIUM CHANNEL                                   | 4                | 103               | 2.52               | f                          |
| 1uexC           | VON WILLEBRAND FACTOR                                             | 4                | 202               | 2.85               | c                          |
| 1u0nD           | PLATELET GLYCOPROTEIN IB                                          | 4                | 265               | 2.95               | c                          |
| 1dzfA           | DNA-DIRECTED RNA POLYMERASES I, II,<br>AND III 27KD POLYPEPTIDE   | 4                | 211               | 1.9                | c, d                       |
| 5cyhA           | CYCLOPHILIN A                                                     | 4                | 164               | 2.1                | b                          |
| 2p6bC           | CALMODULIN-DEPENDENT CALCINEURIN A<br>SUBUNIT ALPHASOFORM         | 4                | 357               | 2.3                | d                          |
| 2f3gB           | GLUCOSE-SPECIFIC PHOSPHOCARRIER                                   | 4                | 150               | 2.13               | b                          |
| 2c1tB           | IMPORTIN ALPHA SUBUNIT                                            | 4                | 423               | 2.6                | a                          |
| 2angA           | ANGIOGENIN                                                        | 4                | 123               | 2                  | d                          |
| 2iy0C           | RAN GTPASE-ACTIVATING PROTEIN 1                                   | 4                | 156               | 2.77               | a                          |
| 2io5B           | HISTONE H3.1                                                      | 4                | 76                | 2.7                | a                          |
| 2ilkA           | INTERLEUKIN-10                                                    | 4                | 155               | 1.6                | a                          |
| 2z8wB           | APICAL MEMBRANE ANTIGEN 1                                         | 4                | 335               | 2.45               | NA                         |

|       |                                                         |    |     |      |         |
|-------|---------------------------------------------------------|----|-----|------|---------|
| 2nu4I | OVOMUCOID                                               | 5  | 51  | 1.75 | g       |
| 1jckD | STAPHYLOCOCCAL ENTEROTOXIN C3                           | 5  | 239 | 3.5  | b, d    |
| 1btgC | BETA NERVE GROWTH FACTOR                                | 5  | 109 | 2.5  | g       |
| 4nn9A | NEURAMINIDASE N9                                        | 5  | 388 | 2.3  | b       |
| 3bmpA | PROTEIN (BONE MORPHOGENETIC PROTEIN 2 (BMP-2))          | 5  | 106 | 2.7  | g       |
| 2uyzA | SUMO-CONJUGATING ENZYME UBC9                            | 5  | 156 | 1.4  | d       |
| 2trxB | THIOREDOXIN                                             | 5  | 108 | 1.68 | c       |
| 2f43A | ATP SYNTHASE ALPHA CHAIN, MITOCHONDRIAL                 | 5  | 480 | 3    | a, b, c |
| 4fapA | FK506-BINDING PROTEIN                                   | 5  | 107 | 2.8  | d       |
| 2ghwA | SPIKE GLYCOPROTEIN                                      | 5  | 191 | 2.3  | d       |
| 2pxrC | GAG-POL POLYPROTEIN (PR160GAG-POL)                      | 5  | 145 | 1.5  | a       |
| 1ytfA | PROTEIN (TATA BINDING PROTEIN (TBP))                    | 5  | 180 | 2.5  | d, d    |
| 1qfwA | GONADOTROPIN ALPHA SUBUNIT                              | 5  | 87  | 3.5  | g       |
| 1urqB | SYNTAXIN 1A                                             | 6  | 63  | 2    | h       |
| 4mbpA | MALTODEXTRIN BINDING PROTEIN                            | 6  | 370 | 1.7  | c       |
| 8cpaA | CARBOXYPEPTIDASE A                                      | 6  | 307 | 2    | c       |
| 3ezeB | PROTEIN (PHOSPHOTRANSFERASE SYSTEM, HPR)                | 6  | 85  | NMR  | d       |
| 2trcB | TRANSDUCIN                                              | 6  | 340 | 2.4  | b       |
| 2atpC | T-CELL SURFACE GLYCOPROTEIN CD8 ALPHA CHAIN             | 6  | 119 | 2.4  | b       |
| 2hueC | HISTONE H4                                              | 6  | 82  | 1.7  | a       |
| 2e76A | CYTOCHROME B6                                           | 6  | 215 | 3.41 | f       |
| 2uyzB | SMALL UBIQUITIN-RELATED MODIFIER 1                      | 7  | 78  | 1.4  | d       |
| 2aq3G | T-CELL RECEPTOR BETA CHAIN V                            | 7  | 109 | 2.3  | b       |
| 3hlaB | BETA 2-MICROGLOBULIN                                    | 8  | 99  | 2.6  | b       |
| 9ptiA | BOVINE PANCREATIC TRYPSIN INHIBITOR                     | 8  | 58  | 1.22 | g       |
| 2iffY | HEN EGG WHITE LYSOZYME                                  | 8  | 129 | 2.65 | d       |
| 4clnA | CALMODULIN                                              | 8  | 148 | 2.2  | a       |
| 2hn7A | HLA CLASS I HISTOCOMPATIBILITY ANTIGEN, A-11ALPHA CHAIN | 9  | 274 | 1.6  | b, d    |
| 2q11A | IGHM PROTEIN                                            | 10 | 209 | 2.53 | b, b    |
| 3cjcA | ACTIN, ALPHA SKELETAL MUSCLE                            | 11 | 372 | 3.9  | c, c    |
| 2vrwA | RAS-RELATED C3 BOTULINUM TOXIN SUBSTRATE 1              | 13 | 177 | 1.85 | c       |
| 1mz4A | CYTOCHROME C550                                         | 13 | 131 | 1.8  | a       |
| 1za3L | FAB-YSD1 LIGHT CHAIN                                    | 16 | 213 | 3.35 | b, b    |
| 2gbrC | UBIQUITIN                                               | 27 | 76  | 2    | d       |

<sup>a</sup>PDB ID + chain ID of the Family Representative (FR).

<sup>b</sup>Number of structural partners

<sup>c</sup>Number of residues of the SR.

<sup>d</sup>X-ray resolution in Å (or 'NMR' for NMR structures).

<sup>e</sup>SCOP class. A multiple entry is reported for multi-domain FRs. In two cases, no SCOP annotation was found ('NA').

**Table S4.** Distribution of residues and interfaces over the three binding classes  $c_{\text{mono}}$ ,  $c_{\text{mono\_in\_multi}}$  and  $c_{\text{multi}}$  for the  $S^{\text{Full}}$ ,  $S^{\text{MD}}$  and  $S^{\text{Soc}}$  datasets.

|                              | Residues          |                 |                  | Interfaces        |                 |
|------------------------------|-------------------|-----------------|------------------|-------------------|-----------------|
|                              | $S^{\text{Full}}$ | $S^{\text{MD}}$ | $S^{\text{Soc}}$ | $S^{\text{Full}}$ | $S^{\text{MD}}$ |
| $c_{\text{mono}}$            | 6821              | 165             | -                | 302               | 7               |
| $c_{\text{mono\_in\_multi}}$ | 4540              | 297             | 2780             | 71                | 3               |
| $c_{\text{multi}}$           | 1261              | 146             | 1910             | 322               | 34              |
| <b>Tot<sup>a</sup></b>       | 12622             | 608             | 4690             | 695               | 44              |

<sup>a</sup> Total number of interface residues and interfaces for all the proteins in each dataset.

**Table S5.** Criteria used for the different hot spot prediction methods.

| <b>Method</b> | <b>Hot spot prediction criteria</b>                                                               |
|---------------|---------------------------------------------------------------------------------------------------|
| ANCHOR        | Binding energy <sup>a</sup> $\leq 2.0$ kcal/mol                                                   |
| Robetta       | $\Delta\Delta G_{\text{bind}}^{\text{b}}$ $\geq 1$ kcal/mol                                       |
| PISA          | $\Delta G_{\text{int}}^{\text{c}}$ $\leq -1$ kcal/mol                                             |
| HotPoint      | Relative accessibility in the complex $\leq 20$ %<br>and contact potential <sup>d</sup> $\geq 18$ |
| KFC2a         | Confidence of KFC2a prediction $> 0$                                                              |
| KFC2b         | Confidence of KFC2b prediction $> 0$                                                              |

<sup>a</sup> Residue contribution to the binding energy as evaluated from the FastContact potential (Meireles et al. (2010) Nucleic Acids Res 38: W407).

<sup>b</sup> Change in the binding free energy when the residue is replaced by alanine.

<sup>c</sup> Residue contribution to the binding energy as given by  $\Delta G_{\text{solv}} + \Delta G_{\text{cont}}$  (Krissinel et al. (2007) J Mol Biol 372: 774).

<sup>d</sup> Tuncbag et al. (2010) Nucleic Acids Res 38: W402.



**Table S6.** Composition of the 12 systems used for MD simulations of the S<sup>MD</sup> dataset

| <b>SR<sup>a</sup></b> | <b>n<sub>res</sub><sup>b</sup></b> | <b>n<sub>wat</sub><sup>c</sup></b> | <b>n<sub>ions</sub><sup>d</sup></b> | <b>n<sub>atoms</sub><sup>e</sup></b> | <b>b<sub>size</sub><sup>f</sup></b> |
|-----------------------|------------------------------------|------------------------------------|-------------------------------------|--------------------------------------|-------------------------------------|
| <b>1orjD</b>          | 125                                | 16897                              | 6 (Na <sup>+</sup> )                | 52016                                | 81.3                                |
| <b>1v74B</b>          | 87                                 | 10952                              | 2 (Na <sup>+</sup> )                | 33756                                | 70.3                                |
| <b>2d5rA</b>          | 252                                | 16211                              | 14 (Na <sup>+</sup> )               | 51301                                | 81.0                                |
| <b>2g2uB</b>          | 165                                | 13009                              | 1 (Na <sup>+</sup> )                | 40631                                | 74.9                                |
| <b>1ugiH</b>          | 83                                 | 8183                               | 12 (Na <sup>+</sup> )               | 25358                                | 64.0                                |
| <b>3cptB</b>          | 116                                | 15166                              | 1 (Na <sup>+</sup> )                | 46614                                | 77.8                                |
| <b>2d48A</b>          | 129                                | 12492                              | 6 (Cl <sup>-</sup> )                | 38841                                | 73.8                                |
| <b>1rypT</b>          | 233                                | 19084                              | 1 (Cl <sup>-</sup> )                | 59555                                | 85.1                                |
| <b>1wm3A</b>          | 72                                 | 7431                               | 1 (Na <sup>+</sup> )                | 23043                                | 61.9                                |
| <b>1oo0A</b>          | 144                                | 13026                              | 4 (Na <sup>+</sup> )                | 40627                                | 74.9                                |
| <b>1v54U</b>          | 79                                 | 10305                              | 5 (Cl <sup>-</sup> )                | 31805                                | 68.9                                |
| <b>1wa5A</b>          | 170                                | 12914                              | 10 (Cl <sup>-</sup> )               | 40603                                | 75.0                                |

<sup>a</sup>PDB ID + chain ID of the Structural Representative (SR).

<sup>b</sup>Number of protein residues

<sup>c</sup>Number of water molecules

<sup>d</sup>Number of counterions (the ion type is indicated in parentheses).

<sup>e</sup>Total number of atoms in the system

<sup>f</sup>Side length (Å) of the cubic box after equilibration.

**Table S7.** Analysis of pairwise RMSD distributions of tCONCOORD and MD ensembles.

| SR <sup>a</sup> | tCONCOORD                            |                                      |                                      | MD                                   |                                      |                                      |
|-----------------|--------------------------------------|--------------------------------------|--------------------------------------|--------------------------------------|--------------------------------------|--------------------------------------|
|                 | pairRMSD <sub>ave</sub> <sup>b</sup> | pairRMSD <sub>min</sub> <sup>c</sup> | pairRMSD <sub>max</sub> <sup>d</sup> | pairRMSD <sub>ave</sub> <sup>b</sup> | pairRMSD <sub>min</sub> <sup>c</sup> | pairRMSD <sub>max</sub> <sup>d</sup> |
| <b>1orjD</b>    | 1.79                                 | 0.44                                 | 5.50                                 | 1.12                                 | 0.50                                 | 2.19                                 |
| <b>1v74B</b>    | 2.09                                 | 0.49                                 | 4.42                                 | 1.65                                 | 0.59                                 | 3.28                                 |
| <b>2d5rA</b>    | 1.82                                 | 0.71                                 | 4.16                                 | 1.85                                 | 0.67                                 | 3.70                                 |
| <b>2g2uB</b>    | 3.01                                 | 1.00                                 | 8.31                                 | 2.19                                 | 0.64                                 | 3.99                                 |
| <b>1ugiH</b>    | 1.91                                 | 0.65                                 | 4.64                                 | 2.03                                 | 0.57                                 | 4.79                                 |
| <b>3cptB</b>    | 2.28                                 | 0.69                                 | 5.35                                 | 2.46                                 | 0.66                                 | 5.06                                 |
| <b>2d48A</b>    | 1.72                                 | 0.63                                 | 4.17                                 | 1.59                                 | 0.54                                 | 3.20                                 |
| <b>1rypT</b>    | 3.40                                 | 0.96                                 | 8.71                                 | 1.80                                 | 0.63                                 | 3.33                                 |
| <b>1wm3A</b>    | 1.38                                 | 0.48                                 | 3.02                                 | 1.94                                 | 0.55                                 | 3.70                                 |
| <b>1oo0A</b>    | 1.78                                 | 0.57                                 | 4.07                                 | 1.72                                 | 0.58                                 | 3.64                                 |
| <b>1v54U</b>    | 2.60                                 | 0.69                                 | 6.26                                 | 3.11                                 | 0.54                                 | 5.96                                 |
| <b>1wa5A</b>    | 2.23                                 | 0.86                                 | 4.30                                 | 1.52                                 | 0.62                                 | 2.68                                 |
| <b>average</b>  | <b>2.17</b>                          | <b>0.68</b>                          | <b>5.24</b>                          | <b>1.92</b>                          | <b>0.59</b>                          | <b>3.79</b>                          |

<sup>a</sup>PDB ID + chain ID of the Structural Representative (SR).

<sup>b</sup>Average pairwise RMSD (Å). Pairwise RMSD values are calculated over all the possible pairs of conformations in the ensemble.

<sup>c</sup>Minimum pairwise RMSD (Å).

<sup>d</sup>Maximum pairwise RMSD (Å).

**Table S8.** Comparison between X/Y pairs of RMSF profiles, with X(Y) = tCON(COORD), MD, GNM or PDB.

|                                              | <b>tCON/MD<sup>a</sup></b> | <b>tCON/PDB</b> | <b>tCON/GNM</b> | <b>MD/PDB</b> | <b>MD/GNM</b> | <b>GNM/PDB</b> |
|----------------------------------------------|----------------------------|-----------------|-----------------|---------------|---------------|----------------|
| <b>C<sup>α</sup> RMSF (S<sup>Full</sup>)</b> | -                          | 0.50 (± 0.20)   | 0.75 (± 0.11)   | -             | -             | 0.47 (± 0.22)  |
| <b>C<sup>α</sup> RMSF (S<sup>MD</sup>)</b>   | 0.75 (± 0.08)              | 0.57 (± 0.14)   | 0.70 (± 0.18)   | 0.55 (± 0.16) | 0.69 (± 0.16) | 0.52 (± 0.17)  |
| <b>SC RMSF (S<sup>Full</sup>)</b>            | -                          | 0.60 (± 0.10)   | -               | -             | -             | -              |
| <b>SC RMSF (S<sup>MD</sup>)</b>              | 0.71 (± 0.06)              | 0.60 (± 0.12)   | -               | 0.63 (± 0.11) | -             | -              |

<sup>a</sup>Average Spearman correlation coefficient between C<sup>α</sup> or side chain (SC) RMSF profiles calculated over the entire dataset (S<sup>Full</sup>) or the MD dataset (S<sup>MD</sup>). The standard deviation is reported in parentheses.

**Table S9.** Overlap between the tCONCOORD, MD and PDB essential spaces.

| SR <sup>a</sup> | nPDB <sup>b</sup> | CovMatOver <sup>c</sup> | CumOver15 <sup>d</sup> | MaxInpr <sup>e</sup> |              |               |
|-----------------|-------------------|-------------------------|------------------------|----------------------|--------------|---------------|
|                 |                   |                         |                        | MD/tCON              | PDB/tCON     | PDB/MD        |
| <b>1orjD</b>    | 5                 | 0.349                   | 0.537                  | 0.759 (3, 2)         | 0.424 (2, 4) | 0.267 (2, 6)  |
| <b>1v74B</b>    | 3                 | 0.309                   | 0.463                  | 0.614 (2, 1)         | 0.529 (1, 3) | 0.389 (1, 8)  |
| <b>2d5rA</b>    | 1                 | 0.360                   | 0.402                  | 0.545 (2, 2)         | -            | -             |
| <b>2g2uB</b>    | 6                 | 0.363                   | 0.499                  | 0.852 (3, 1)         | 0.478 (3, 2) | 0.404 (3, 10) |
| <b>1ugiH</b>    | 30                | 0.421                   | 0.542                  | 0.603 (3, 1)         | 0.499 (1, 2) | 0.387 (1, 7)  |
| <b>3cptB</b>    | 6                 | 0.376                   | 0.489                  | 0.631 (3, 2)         | 0.558 (2, 3) | 0.445 (2, 4)  |
| <b>2d48A</b>    | 17                | 0.356                   | 0.495                  | 0.336 (1, 5)         | 0.34 (2, 4)  | 0.392 (2, 7)  |
| <b>1rypT</b>    | 22                | 0.274                   | 0.458                  | 0.589 (3, 1)         | 0.315 (1, 1) | 0.297 (1, 4)  |
| <b>1wm3A</b>    | 12                | 0.305                   | 0.434                  | 0.423 (2, 1)         | 0.42 (2, 13) | 0.343 (1, 1)  |
| <b>1oo0A</b>    | 11                | 0.332                   | 0.418                  | 0.578 (3, 2)         | 0.319 (2, 8) | 0.402 (2, 4)  |
| <b>1v54U</b>    | 28                | 0.280                   | 0.472                  | 0.424 (2, 8)         | 0.335 (2, 1) | 0.372 (2, 14) |
| <b>1wa5A</b>    | 29                | 0.347                   | 0.481                  | 0.434 (3, 5)         | 0.414 (1, 6) | 0.409 (1, 5)  |
| average         |                   | <b>0.339</b>            | <b>0.474</b>           | <b>0.566</b>         | <b>0.421</b> | <b>0.373</b>  |

<sup>a</sup>PDB ID + chain ID of the Structural Representative (SR).

<sup>b</sup>Number of PDB structures in the ensemble.

<sup>c</sup>Normalized overlap of the covariance matrices.

<sup>d</sup>Cumulative overlap between the first 15 PCs from MD and tCONCOORD ensembles.

<sup>e</sup>Maximum inner product between the first 3 PCs of ensemble X and the first 15 PCs of ensemble Y. The X/Y pair is indicated in the column label. The indices of the PCs from the X and Y ensembles with the largest inner product value are indicated in parentheses. Only PDB ensembles with nPDB > 1 were considered.

**Table S10.** Average per-residue configurational entropy for  $c_{\text{mono\_in\_multi}}$  and  $c_{\text{multi}}$  residues in  $S^{\text{MD}}$ .

| SR <sup>a</sup> | TS <sup>b</sup>              |                    |                     | TS (main chain) <sup>c</sup> |                    |                     |
|-----------------|------------------------------|--------------------|---------------------|------------------------------|--------------------|---------------------|
|                 | $c_{\text{mono\_in\_multi}}$ | $c_{\text{multi}}$ | $\Delta(\text{TS})$ | $c_{\text{mono\_in\_multi}}$ | $c_{\text{multi}}$ | $\Delta(\text{TS})$ |
| <b>2d48A</b>    | 12.66                        | 14.18              | 1.52                | 5.61                         | 6.26               | 0.65                |
| <b>1rypT</b>    | 13.83                        | 14.82              | 0.99                | 6.47                         | 7.02               | 0.55                |
| <b>1wm3A</b>    | 14.31                        | 15.21              | 0.90                | 6.38                         | 6.92               | 0.54                |
| <b>1oo0A</b>    | 13.56                        | 14.79              | 1.23                | 6.09                         | 6.53               | 0.43                |
| <b>1v54U</b>    | 14.78                        | 15.46              | 0.68                | 7.25                         | 7.15               | -0.10               |
| <b>1wa5A</b>    | 12.64                        | 13.58              | 0.94                | 5.56                         | 6.13               | 0.56                |
|                 |                              | average            | <b>1.04</b>         |                              | average            | <b>0.44</b>         |

<sup>a</sup>PDB ID + chain ID of the Structural Representative (SR).

<sup>b</sup>Per-residue entropy term TS (T = 300K) in kcal/mol averaged over  $c_{\text{mono\_in\_multi}}$  and  $c_{\text{multi}}$  residues of each multi-partner protein in  $S^{\text{MD}}$ . To make entropy values of different residue types comparable, the entropy of each residue is normalised by the total number of its atoms and multiplied by 10 (average number of atoms in a residue).

<sup>c</sup>Per-residue entropy term TS (T = 300K) in kcal/mol calculated considering main chain atoms only and averaged over  $c_{\text{mono\_in\_multi}}$  and  $c_{\text{multi}}$  residues.

**Table S11.** Percentage of  $c_{\text{multi}}$  residues classified as hot spots in 1 to 4 different interfaces.

| <b>Number of interfaces</b> | <b>ANCHOR</b> | <b>ROBETTA</b> | <b>PISA</b> | <b>HotPoint</b> | <b>KFC2a</b> | <b>KFC2b</b> |
|-----------------------------|---------------|----------------|-------------|-----------------|--------------|--------------|
| <b>1</b>                    | 79.4          | 81.6           | 88.4        | 81.6            | 85.6         | 83.8         |
| <b>2</b>                    | 16.5          | 15.3           | 9.1         | 14.1            | 11.5         | 12.8         |
| <b>3</b>                    | 3.2           | 2.4            | 1.4         | 4.1             | 2.1          | 3.4          |
| <b>4</b>                    | 0.9           | 0.7            | 1.1         | 0.3             | 0.9          | 0.0          |

**Table S12.** SNP and DisSNP propensity in the  $S^{\text{Full}}$  and  $S^{\text{Soc}}$  datasets (values per protein).

| $C_{\text{mono}}$ | $P_{\text{SNP}}^{\text{a}}$ | $P_{\text{DisSNP}}^{\text{a}}$ | $C_{\text{mono in multi}}$ | $P_{\text{SNP}}^{\text{b}}$ | $P_{\text{DisSNP}}^{\text{b}}$ | $C_{\text{multi}}$ | $P_{\text{SNP}}^{\text{b}}$ | $P_{\text{DisSNP}}^{\text{b}}$ |
|-------------------|-----------------------------|--------------------------------|----------------------------|-----------------------------|--------------------------------|--------------------|-----------------------------|--------------------------------|
| <b>2i3sA</b>      | 0.00                        | -                              | <b>1b3uA</b>               | 1.55                        | -                              | <b>1b3uA</b>       | 0.00                        | -                              |
| <b>1gggA</b>      | 0.00                        | -                              | <b>1f3hA</b>               | 2.04                        | -                              | <b>1f3hA</b>       | 0.52                        | -                              |
| <b>1ai2A</b>      | 0.31                        | -                              | <b>2aczC</b>               | 1.00                        | -                              | <b>2aczC</b>       | 0.00                        | -                              |
| <b>1bwpA</b>      | 2.42                        | -                              | <b>3b9uA</b>               | 1.01                        | -                              | <b>3b9uA</b>       | 0.00                        | -                              |
| <b>1aiuA</b>      | 0.00                        | -                              | <b>3b6fC</b>               | 0.58                        | -                              | <b>3b6fC</b>       | 0.00                        | -                              |
| <b>1ajaA</b>      | 0.95                        | -                              | <b>2bkrB</b>               | 0.00                        | -                              | <b>2bkrB</b>       | 1.39                        | -                              |
| <b>1cddA</b>      | 0.73                        | -                              | <b>1fntF</b>               | 0.00                        | -                              | <b>1fntF</b>       | 0.00                        | -                              |
| <b>2av6A</b>      | 1.34                        | 1.20                           | <b>3bdmG</b>               | 1.69                        | -                              | <b>3bdmG</b>       | 0.00                        | -                              |
| <b>1a03A</b>      | 1.26                        | -                              | <b>3bdmL</b>               | 0.37                        | -                              | <b>3bdmL</b>       | 0.00                        | -                              |
| <b>1psrA</b>      | 1.68                        | -                              | <b>2bkuA</b>               | 2.29                        | 2.29                           | <b>2bkuA</b>       | 1.18                        | 1.18                           |
| <b>2ca6A</b>      | 3.72                        | -                              | <b>2b63K</b>               | 1.12                        | -                              | <b>2b63K</b>       | 0.00                        | -                              |
| <b>1av5A</b>      | 1.53                        | -                              | <b>2ckhB</b>               | 0.00                        | -                              | <b>2ckhB</b>       | 0.00                        | -                              |
| <b>2dgkA</b>      | 1.05                        | -                              | <b>1b9xA</b>               | 0.00                        | -                              | <b>1b9xA</b>       | 0.00                        | -                              |
| <b>1n4pB</b>      | 2.54                        | -                              | <b>1a4rA</b>               | 0.91                        | -                              | <b>1a4rA</b>       | 0.43                        | -                              |
| <b>1bsvA</b>      | 0.92                        | 0.60                           | <b>1a0uA</b>               | 0.92                        | 1.19                           | <b>1a0uA</b>       | 1.48                        | 0.75                           |
| <b>1ek5A</b>      | 0.70                        | 0.00                           | <b>1ni4A</b>               | 0.85                        | 1.41                           | <b>1ni4A</b>       | 0.00                        | 0.00                           |
| <b>1d2fA</b>      | 0.00                        | -                              | <b>1i2mB</b>               | 2.77                        | -                              | <b>1i2mB</b>       | -                           | -                              |
| <b>1ex6A</b>      | 0.00                        | -                              | <b>2f0yB</b>               | 0.00                        | -                              | <b>2f0yB</b>       | 2.70                        | -                              |
|                   |                             |                                | <b>1dvcA</b>               | 1.11                        | -                              | <b>1dvcA</b>       | 0.00                        | -                              |
|                   |                             |                                | <b>2avyH</b>               | 3.81                        | -                              | <b>2avyH</b>       | 0.00                        | -                              |

Propensities are calculated with respect to the surface of each protein.

<sup>a</sup> Only the mono-partner proteins of  $S^{\text{Full}}$  with a human homologue and SNP annotation were considered (see Methods).

<sup>b</sup> Only the multi-partner proteins of  $S^{\text{Full}}$  with a human homologue and SNP annotation were considered (see Methods).

Table S12 - continued

| <b>C<sub>mono in multi(Soc)</sub></b> | <b>P<sub>SNP</sub><sup>c</sup></b> | <b>P<sub>DisSNP</sub><sup>c</sup></b> | <b>C<sub>multi(Soc)</sub></b> | <b>P<sub>SNP</sub><sup>c</sup></b> | <b>P<sub>DisSNP</sub><sup>c</sup></b> |
|---------------------------------------|------------------------------------|---------------------------------------|-------------------------------|------------------------------------|---------------------------------------|
| <b>3cjcA</b>                          | 0.87                               | 1.30                                  | <b>3cjcA</b>                  | 0.00                               | 0.31                                  |
| <b>2atpC</b>                          | 5.45                               | -                                     | <b>2atpC</b>                  | 0.00                               | -                                     |
| <b>2aq3G</b>                          | 0.99                               | -                                     | <b>2aq3G</b>                  | 1.25                               | -                                     |
| <b>2iadA</b>                          | 0.73                               | -                                     | <b>2iadA</b>                  | 1.49                               | -                                     |
| <b>2jixE</b>                          | 0.48                               | -                                     | <b>2jixE</b>                  | 0.00                               | -                                     |
| <b>4fapA</b>                          | 0.00                               | -                                     | <b>4fapA</b>                  | 2.63                               | -                                     |
| <b>2c1tB</b>                          | 0.61                               | -                                     | <b>2c1tB</b>                  | 0.00                               | -                                     |
| <b>2nljC</b>                          | -                                  | 0.94                                  | <b>2nljC</b>                  | -                                  | 1.23                                  |
| <b>1uexC</b>                          | 0.00                               | -                                     | <b>1uexC</b>                  | 0.00                               | -                                     |
| <b>2pcxA</b>                          | 1.31                               | 0.99                                  | <b>2pcxA</b>                  | 1.14                               | 3.42                                  |
| <b>2trxB</b>                          | 4.82                               | -                                     | <b>2trxB</b>                  | 2.52                               | -                                     |
| <b>2p6bC</b>                          | 2.59                               | -                                     | <b>2p6bC</b>                  | 0.00                               | -                                     |
| <b>1dzfA</b>                          | 1.22                               | -                                     | <b>1dzfA</b>                  | 0.00                               | -                                     |
| <b>2uyzA</b>                          | 1.26                               | -                                     | <b>2uyzA</b>                  | 1.60                               | -                                     |
| <b>2f43A</b>                          | 1.60                               | -                                     | <b>2f43A</b>                  | 0.00                               | -                                     |
| <b>2vpfH</b>                          | 1.01                               | -                                     | <b>2vpfH</b>                  | 1.60                               | -                                     |
| <b>2trcB</b>                          | 0.00                               | -                                     | <b>2trcB</b>                  | 0.00                               | -                                     |
| <b>2vrwA</b>                          | 0.00                               | -                                     | <b>2vrwA</b>                  | 0.00                               | -                                     |
| <b>2nz1Y</b>                          | 0.73                               | -                                     | <b>2nz1Y</b>                  | 1.21                               | -                                     |
| <b>2hn7A</b>                          | 1.02                               | -                                     | <b>2hn7A</b>                  | 1.19                               | -                                     |
| <b>4clnA</b>                          | 1.42                               | -                                     | <b>4clnA</b>                  | 0.79                               | -                                     |
| <b>3bmpA</b>                          | 0.55                               | -                                     | <b>3bmpA</b>                  | 1.56                               | -                                     |
| <b>2uyzB</b>                          | 0.00                               | -                                     | <b>2uyzB</b>                  | 0.00                               | -                                     |
| <b>8cpaA</b>                          | 1.71                               | -                                     | <b>8cpaA</b>                  | 2.00                               | -                                     |
| <b>9ptiA</b>                          | 1.70                               | -                                     | <b>9ptiA</b>                  | 0.59                               | -                                     |

<sup>c</sup> Only the multi-partner proteins of S<sup>Full</sup> with a human homologue and SNP annotation were considered (see Methods).



**Table S13.** C<sup>α</sup> and side chain (SC) RMSF Z-scores of c<sub>mono\_in\_multi</sub> and c<sub>multi</sub> interface residues of Neddylin.

| resid <sup>a</sup>         | b <sup>b</sup> | DSSP <sup>c</sup> | tCON ensemble <sup>d</sup> |               | PDB ensemble <sup>e</sup> |               |
|----------------------------|----------------|-------------------|----------------------------|---------------|---------------------------|---------------|
|                            |                |                   | C <sup>α</sup> RMSF        | SC RMSF       | C <sup>α</sup> RMSF       | SC RMSF       |
| c <sub>mono_in_multi</sub> |                |                   |                            |               |                           |               |
| E28                        | 1              | H                 | -0.65                      | 0.61          | -0.14                     | -0.27         |
| R29                        | 1              | H                 | -0.64                      | 0.25          | 0.39                      | 2.03          |
| E31                        | 1              | H                 | -0.53                      | 1.12          | -0.15                     | -1.00         |
| E32                        | 1              | H                 | -0.17                      | 1.02          | 0.36                      | 0.86          |
| E34                        | 1              | H                 | -0.13                      | 0.64          | -0.22                     | 0.42          |
| G35                        | 1              | ~                 | 0.11                       | -             | -0.22                     | -             |
| I36                        | 1              | ~                 | -0.02                      | -0.83         | -0.16                     | 0.04          |
| Q39                        | 1              | G                 | 1.51                       | 0.67          | 0.34                      | 1.08          |
| Y45                        | 1              | E                 | 0.02                       | 0.61          | -0.80                     | 0.37          |
| S46                        | 1              | T                 | 1.64                       | -0.80         | 0.50                      | -             |
| M50                        | 1              | ~                 | -0.58                      | -0.33         | -0.26                     | 0.22          |
| D52                        | 1              | T                 | -0.31                      | 0.83          | -0.08                     | 0.59          |
| E53                        | 1              | T                 | 0.29                       | 0.78          | -0.60                     | 0.94          |
| Y59                        | 1              | T                 | -0.09                      | 0.57          | -0.29                     | -0.84         |
| <b>average</b>             |                |                   | 0.03 (± 0.72)              | 0.40 (± 0.65) | -0.09 (± 0.38)            | 0.37 (± 0.84) |
| c <sub>multi</sub>         |                |                   |                            |               |                           |               |
| K6                         | 2              | E                 | -0.70                      | 0.37          | -0.10                     | -0.01         |
| T7                         | 2              | ~                 | 0.56                       | -0.31         | 2.37                      | 0.09          |
| <b>L8</b>                  | <b>3</b>       | <b>T</b>          | <b>2.56</b>                | <b>0.43</b>   | <b>4.64</b>               | <b>0.47</b>   |
| T9                         | 4              | T                 | 3.73                       | 0.15          | 2.65                      | -1.07         |
| G10                        | 2              | S                 | 3.47                       | -             | 2.00                      | -             |
| K11                        | 2              | ~                 | 1.98                       | 2.88          | 0.53                      | -             |
| Q40                        | 2              | G                 | 0.66                       | -0.08         | -0.68                     | 2.12          |
| <b>R42</b>                 | <b>3</b>       | <b>E</b>          | <b>-0.75</b>               | <b>0.67</b>   | <b>-0.64</b>              | <b>1.49</b>   |
| <b>I44</b>                 | <b>2</b>       | <b>E</b>          | <b>-0.82</b>               | <b>-0.21</b>  | <b>-0.67</b>              | <b>-0.12</b>  |
| <b>G47</b>                 | <b>2</b>       | <b>T</b>          | <b>1.78</b>                | -             | <b>0.61</b>               | -             |
| <b>K48</b>                 | <b>3</b>       | <b>E</b>          | <b>1.06</b>                | <b>2.09</b>   | <b>0.69</b>               | <b>1.85</b>   |
| <b>Q49</b>                 | <b>2</b>       | <b>E</b>          | <b>0.40</b>                | <b>1.69</b>   | <b>-0.47</b>              | <b>0.94</b>   |
| <b>N51</b>                 | <b>2</b>       | <b>~</b>          | <b>-0.33</b>               | <b>-0.48</b>  | <b>-0.34</b>              | <b>-0.24</b>  |
| K54                        | 2              | S                 | 0.02                       | 0.51          | -0.55                     | -0.14         |
| <b>H68</b>                 | <b>2</b>       | <b>E</b>          | <b>-1.02</b>               | <b>0.17</b>   | <b>-0.50</b>              | <b>-0.77</b>  |
| <b>V70</b>                 | <b>2</b>       | <b>E</b>          | <b>-0.22</b>               | <b>0.18</b>   | <b>0.77</b>               | <b>0.49</b>   |
| <b>L71</b>                 | <b>2</b>       | <b>E</b>          | <b>1.07</b>                | <b>0.91</b>   | <b>4.03</b>               | <b>0.14</b>   |
| <b>average</b>             |                |                   | 0.79 (± 1.48)              | 0.60 (± 0.94) | 0.84 (± 1.70)             | 0.37 (± 0.94) |

<sup>a</sup> Residues identified as hot spots by at least two prediction methods are reported in bold.

<sup>b</sup> Binding multiplicity.

<sup>c</sup> DSSP secondary structure (H = α helix, G = 3<sub>10</sub> helix, E = β strand, T = turn, S = bend, ~ = irregular).

<sup>d</sup> RMSF Z-scores from tCONCOORD ensemble. Standard deviations are reported in parentheses.

<sup>e</sup> RMSF Z-scores from PDB ensemble. Standard deviations are reported in parentheses.

**Table S14.** C<sup>α</sup> and side chain (SC) RMSF Z-scores of c<sub>mono\_in\_multi</sub> and c<sub>multi</sub> interface residues of SUMO-2.

| resid <sup>a</sup>         | b <sup>b</sup> | DSSP <sup>c</sup> | tCON ensemble <sup>d</sup> |                       | PDB ensemble <sup>e</sup> |                       |
|----------------------------|----------------|-------------------|----------------------------|-----------------------|---------------------------|-----------------------|
|                            |                |                   | C <sup>α</sup> RMSF        | SC RMSF               | C <sup>α</sup> RMSF       | SC RMSF               |
| c <sub>mono_in_multi</sub> |                |                   |                            |                       |                           |                       |
| N3                         | 1              | E                 | -0.28                      | -0.59                 | -                         | -                     |
| K5                         | 1              | E                 | -0.78                      | 0.36                  | -1.20                     | -0.15                 |
| A7                         | 1              | E                 | -0.76                      | -1.17                 | -1.23                     | -1.64                 |
| <b>V14</b>                 | <b>1</b>       | <b>E</b>          | <b>-0.68</b>               | <b>-0.96</b>          | <b>-0.91</b>              | <b>-1.43</b>          |
| K19                        | 1              | ~                 | -0.26                      | 0.74                  | -1.03                     | 1.33                  |
| T22                        | 1              | S                 | -0.16                      | -1.13                 | -0.94                     | -0.61                 |
| L27                        | 1              | H                 | -0.98                      | -0.92                 | -0.44                     | -0.87                 |
| K29                        | 1              | H                 | -0.59                      | 0.58                  | -0.05                     | 0.73                  |
| <b>Y31</b>                 | <b>1</b>       | <b>H</b>          | <b>-0.54</b>               | <b>0.71</b>           | <b>-0.09</b>              | <b>1.18</b>           |
| C32                        | 1              | H                 | -0.33                      | -0.80                 | 0.68                      | -                     |
| L37                        | 1              | ~                 | 0.44                       | -0.43                 | 0.45                      | -0.38                 |
| S38                        | 1              | ~                 | 0.62                       | -1.08                 | 0.94                      | -0.04                 |
| M39                        | 1              | T                 | 0.36                       | -0.31                 | 1.26                      | 0.74                  |
| <b>R43</b>                 | <b>1</b>       | <b>E</b>          | <b>-0.32</b>               | <b>1.01</b>           | <b>-0.65</b>              | <b>1.92</b>           |
| <b>R45</b>                 | <b>1</b>       | <b>E</b>          | <b>-0.77</b>               | <b>0.87</b>           | <b>-0.73</b>              | <b>0.96</b>           |
| F46                        | 1              | E                 | -0.55                      | -0.07                 | -0.28                     | -0.90                 |
| <b>D47</b>                 | <b>1</b>       | <b>T</b>          | <b>0.78</b>                | <b>1.76</b>           | <b>0.17</b>               | <b>0.13</b>           |
| G48                        | 1              | T                 | 0.98                       | -                     | 2.04                      | -                     |
| Q49                        | 1              | E                 | 0.43                       | 0.04                  | 0.51                      | 0.91                  |
| P50                        | 1              | E                 | 0.22                       | -1.04                 | 0.60                      | -1.56                 |
| N52                        | 1              | ~                 | -0.14                      | 0.43                  | 0.53                      | -0.21                 |
| D55                        | 1              | ~                 | -0.29                      | -0.18                 | -0.55                     | -0.46                 |
| L60                        | 1              | T                 | -0.31                      | -0.80                 | 2.21                      | 0.09                  |
| D66                        | 1              | ~                 | -0.38                      | 0.33                  | -1.56                     | -0.93                 |
| <b>D69</b>                 | <b>1</b>       | <b>E</b>          | <b>-0.94</b>               | <b>-0.16</b>          | <b>-0.92</b>              | <b>-0.07</b>          |
| <b>average</b>             |                |                   | <b>-0.21 (± 0.55)</b>      | <b>-0.12 (± 0.81)</b> | <b>-0.05 (± 1.01)</b>     | <b>-0.06 (± 0.98)</b> |
| c <sub>multi</sub>         |                |                   |                            |                       |                           |                       |
| Q9                         | 2              | T                 | 2.83                       | 2.35                  | -0.56                     | 1.18                  |
| <b>D10</b>                 | <b>3</b>       | <b>T</b>          | <b>4.24</b>                | <b>0.17</b>           | <b>1.23</b>               | <b>0.29</b>           |
| G11                        | 3              | S                 | 3.49                       | -                     | 2.76                      | -                     |
| S12                        | 2              | ~                 | 1.72                       | -0.17                 | -0.60                     | -0.62                 |
| <b>V13</b>                 | <b>2</b>       | <b>E</b>          | <b>0.15</b>                | <b>-0.13</b>          | <b>-0.66</b>              | <b>-0.52</b>          |
| <b>Q15</b>                 | <b>2</b>       | <b>E</b>          | <b>-0.66</b>               | <b>0.03</b>           | <b>-0.67</b>              | <b>0.92</b>           |
| <b>F16</b>                 | <b>2</b>       | <b>E</b>          | <b>-0.78</b>               | <b>0.16</b>           | <b>-0.31</b>              | <b>-0.55</b>          |
| <b>K17</b>                 | <b>2</b>       | <b>E</b>          | <b>-0.49</b>               | <b>1.06</b>           | <b>-0.35</b>              | <b>0.87</b>           |
| <b>I18</b>                 | <b>2</b>       | <b>E</b>          | <b>-0.59</b>               | <b>-0.33</b>          | <b>-0.83</b>              | <b>0.30</b>           |
| K26                        | 2              | H                 | -0.67                      | 0.84                  | -0.37                     | 2.07                  |
| A30                        | 2              | H                 | -0.48                      | -1.36                 | -0.19                     | -1.62                 |
| E33                        | 2              | H                 | 0.15                       | 0.87                  | 0.47                      | 0.58                  |
| <b>R34</b>                 | <b>2</b>       | <b>H</b>          | <b>0.42</b>                | <b>1.95</b>           | <b>-0.07</b>              | <b>2.63</b>           |

|                |          |          |                    |                    |                    |                    |
|----------------|----------|----------|--------------------|--------------------|--------------------|--------------------|
| <b>Q35</b>     | <b>2</b> | <b>H</b> | <b>0.46</b>        | <b>0.01</b>        | <b>0.41</b>        | <b>1.32</b>        |
| G36            | 2        | T        | 0.70               | -                  | 0.08               | -                  |
| <b>R40</b>     | <b>2</b> | <b>T</b> | <b>1.73</b>        | <b>1.75</b>        | <b>0.84</b>        | <b>0.93</b>        |
| <b>average</b> |          |          | 0.76 ( $\pm$ 1.59) | 0.51 ( $\pm$ 1.01) | 0.07 ( $\pm$ 0.92) | 0.56 ( $\pm$ 1.13) |

<sup>a</sup> Residues identified as hot spots by at least two prediction methods are reported in bold.

<sup>b</sup> Binding multiplicity.

<sup>c</sup> DSSP secondary structure (H =  $\alpha$  helix, E =  $\beta$  strand, T = turn, S = bend, ~ = irregular).

<sup>d</sup> RMSF Z-scores from tCONCOORD ensemble. Standard deviations are reported in parentheses.

<sup>e</sup> RMSF Z-scores from PDB ensemble. Standard deviations are reported in parentheses.
